# Supplementary material
Source: MDPI journal article supplement (https://www.mdpi.com/2071-1050/13/23/13383)
Supplement: s1 [file s1]

The construction land carrying capacity in Beijing:

First-order difference unit root test results of construction land carrying capacity in Beijing

|                                        |           | t-Statistic | Prob.* |
|----------------------------------------|-----------|-------------|--------|
| Augmented Dickey-Fuller test statistic |           | -3.1457     | 0.0094 |
| Test critical values:                  | 1% level  | -3.1095     |        |
|                                        | 5% level  | -2.0439     |        |
|                                        | 10% level | -1.5973     |        |

| Autocorrelation                                                                   | Partial Correlation                                                               | AC | PAC    | Q-Stat | Prob   |       |
|-----------------------------------------------------------------------------------|-----------------------------------------------------------------------------------|----|--------|--------|--------|-------|
| 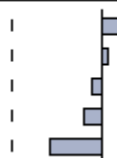 |  | 1  | 0.173  | 0.173  | 0.2873 | 0.592 |
|                                                                                   |                                                                                   | 2  | 0.047  | 0.018  | 0.3143 | 0.855 |
|                                                                                   |                                                                                   | 3  | -0.095 | -0.109 | 0.4575 | 0.928 |
|                                                                                   |                                                                                   | 4  | -0.163 | -0.135 | 1.0916 | 0.896 |
|                                                                                   |                                                                                   | 5  | -0.463 | -0.432 | 11.395 | 0.044 |

The AC and PAC of construction land carrying capacity in Beijing

| Autocorrelation                                                                   | Partial Correlation                                                               | AC | PAC    | Q-Stat | Prob   |       |
|-----------------------------------------------------------------------------------|-----------------------------------------------------------------------------------|----|--------|--------|--------|-------|
|  |  | 1  | 0.290  | 0.290  | 0.8065 | 0.369 |
|                                                                                   |                                                                                   | 2  | -0.503 | -0.641 | 3.8416 | 0.146 |
|                                                                                   |                                                                                   | 3  | -0.354 | 0.132  | 5.8418 | 0.120 |
|                                                                                   |                                                                                   | 4  | 0.036  | -0.297 | 5.8736 | 0.209 |
|                                                                                   |                                                                                   | 5  | 0.030  | -0.161 | 5.9174 | 0.314 |

The AC and PAC of ARIAM(2,1,1)

The ecological land carrying capacity in Beijing:

First-order difference unit root test results of ecological land carrying capacity in Beijing

|                                        |           | t-Statistic | Prob.* |
|----------------------------------------|-----------|-------------|--------|
| Augmented Dickey-Fuller test statistic |           | -4.2938     | 0.0023 |
| Test critical values:                  | 1% level  | -3.1095     |        |
|                                        | 5% level  | -2.0439     |        |
|                                        | 10% level | -1.5973     |        |

| Autocorrelation                                                                     |                                                                                     | Partial Correlation |        | AC     | PAC    | Q-Stat | Prob |
|-------------------------------------------------------------------------------------|-------------------------------------------------------------------------------------|---------------------|--------|--------|--------|--------|------|
|  |  | 1                   | 0.251  | 0.251  | 0.6062 | 0.436  |      |
|                                                                                     |                                                                                     | 2                   | 0.021  | -0.045 | 0.6116 | 0.737  |      |
|                                                                                     |                                                                                     | 3                   | -0.072 | -0.071 | 0.6956 | 0.874  |      |
|                                                                                     |                                                                                     | 4                   | -0.260 | -0.240 | 2.3189 | 0.677  |      |
|                                                                                     |                                                                                     | 5                   | -0.440 | -0.364 | 11.609 | 0.041  |      |

The AC and PAC of ecological land carrying capacity in Beijing

| Autocorrelation                                                                     | Partial Correlation                                                                 | AC | PAC    | Q-Stat | Prob   |       |
|-------------------------------------------------------------------------------------|-------------------------------------------------------------------------------------|----|--------|--------|--------|-------|
| 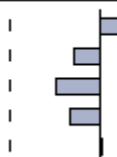 |  | 1  | 0.381  | 0.381  | 1.3933 | 0.238 |
|                                                                                     |                                                                                     | 2  | -0.233 | -0.442 | 2.0420 | 0.360 |
|                                                                                     |                                                                                     | 3  | -0.392 | -0.139 | 4.4962 | 0.213 |
|                                                                                     |                                                                                     | 4  | -0.266 | -0.159 | 6.1975 | 0.185 |
|                                                                                     |                                                                                     | 5  | 0.009  | 0.021  | 6.2018 | 0.287 |

The AC and PAC of ARIAM(2,1,2)

The cultivated land carrying capacity in Shanghai:

Second-order difference unit root test results of cultivated land carrying capacity in Shanghai

|  |  | t-Statistic | Prob.* |
|--|--|-------------|--------|
|--|--|-------------|--------|

|                                        |           |         |        |
|----------------------------------------|-----------|---------|--------|
| Augmented Dickey-Fuller test statistic |           | -2.4538 | 0.0261 |
| Test critical values:                  | 1% level  | -3.1095 |        |
|                                        | 5% level  | -2.0439 |        |
|                                        | 10% level | -1.5973 |        |

| Autocorrelation                                                                   | Partial Correlation                                                               | AC       | PAC    | Q-Stat | Prob  |
|-----------------------------------------------------------------------------------|-----------------------------------------------------------------------------------|----------|--------|--------|-------|
|  |  | 1 -0.028 | -0.028 | 0.0070 | 0.933 |
|                                                                                   |                                                                                   | 2 -0.624 | -0.625 | 4.5493 | 0.103 |
|                                                                                   |                                                                                   | 3 0.027  | -0.032 | 4.5619 | 0.207 |
|                                                                                   |                                                                                   | 4 0.126  | -0.435 | 5.1135 | 0.276 |

The AC and PAC of cultivated land carrying capacity in Shanghai

| Autocorrelation                                                                   | Partial Correlation                                                               | AC       | PAC    | Q-Stat | Prob  |
|-----------------------------------------------------------------------------------|-----------------------------------------------------------------------------------|----------|--------|--------|-------|
| 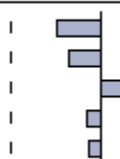 |  | 1 -0.386 | -0.386 | 1.4338 | 0.231 |
|                                                                                   |                                                                                   | 2 -0.285 | -0.510 | 2.4069 | 0.300 |
|                                                                                   |                                                                                   | 3 0.416  | 0.083  | 5.1749 | 0.159 |
|                                                                                   |                                                                                   | 4 -0.132 | -0.010 | 5.5919 | 0.232 |
|                                                                                   |                                                                                   | 5 -0.113 | 0.045  | 6.2035 | 0.287 |

The AC and PAC of ARIAM(1,2,1)

The construction land carrying capacity in Shanghai:

First-order difference unit root test results of construction land carrying capacity in Shanghai

|                                        |           |             |        |
|----------------------------------------|-----------|-------------|--------|
|                                        |           | t-Statistic | Prob.* |
| Augmented Dickey-Fuller test statistic |           | -4.9584     | 0.0116 |
| Test critical values:                  | 1% level  | -5.1198     |        |
|                                        | 5% level  | -3.5195     |        |
|                                        | 10% level | -2.8984     |        |

| Autocorrelation                                                                     | Partial Correlation                                                                 | AC       | PAC    | Q-Stat | Prob  |
|-------------------------------------------------------------------------------------|-------------------------------------------------------------------------------------|----------|--------|--------|-------|
| 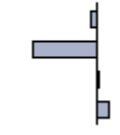 |  | 1 -0.056 | -0.056 | 0.0271 | 0.869 |
|                                                                                     |                                                                                     | 2 -0.576 | -0.581 | 3.8941 | 0.143 |
|                                                                                     |                                                                                     | 3 0.022  | -0.092 | 3.9026 | 0.272 |
|                                                                                     |                                                                                     | 4 0.109  | -0.354 | 4.3208 | 0.364 |

The AC and PAC of construction land carrying capacity in Shanghai

| Autocorrelation                                                                     | Partial Correlation                                                                 | AC       | PAC    | Q-Stat | Prob  |
|-------------------------------------------------------------------------------------|-------------------------------------------------------------------------------------|----------|--------|--------|-------|
| 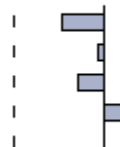 |  | 1 -0.372 | -0.372 | 1.3290 | 0.249 |
|                                                                                     |                                                                                     | 2 -0.065 | -0.236 | 1.3791 | 0.502 |
|                                                                                     |                                                                                     | 3 -0.239 | -0.438 | 2.2903 | 0.514 |
|                                                                                     |                                                                                     | 4 0.183  | -0.216 | 3.0981 | 0.542 |
|                                                                                     |                                                                                     | 5 -0.008 | -0.208 | 3.1013 | 0.684 |

The AC and PAC of ARIAM(1,1,1)

The ecological land carrying capacity in Shanghai:

Second-order difference unit root test results of ecological land carrying capacity in Shanghai

|                                        |           |             |        |
|----------------------------------------|-----------|-------------|--------|
|                                        |           | t-Statistic | Prob.* |
| Augmented Dickey-Fuller test statistic |           | -7.3658     | 0.0017 |
| Test critical values:                  | 1% level  | -5.1198     |        |
|                                        | 5% level  | -3.5195     |        |
|                                        | 10% level | -2.8984     |        |

| Autocorrelation                                                                   | Partial Correlation                                                               | AC       | PAC    | Q-Stat | Prob  |
|-----------------------------------------------------------------------------------|-----------------------------------------------------------------------------------|----------|--------|--------|-------|
| 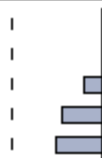 |  | 1 0.383  | 0.383  | 1.4073 | 0.236 |
|                                                                                   |                                                                                   | 2 0.055  | -0.107 | 1.4440 | 0.486 |
|                                                                                   |                                                                                   | 3 -0.168 | -0.179 | 1.8962 | 0.594 |
|                                                                                   |                                                                                   | 4 -0.353 | -0.263 | 4.8796 | 0.300 |
|                                                                                   |                                                                                   | 5 -0.417 | -0.254 | 13.245 | 0.021 |

The AC and PAC of ecological land carrying capacity in Shanghai

| Autocorrelation                                                                   | Partial Correlation                                                               | AC       | PAC    | Q-Stat | Prob  |
|-----------------------------------------------------------------------------------|-----------------------------------------------------------------------------------|----------|--------|--------|-------|
| 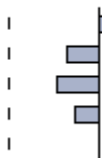 |  | 1 0.366  | 0.366  | 1.2883 | 0.256 |
|                                                                                   |                                                                                   | 2 -0.279 | -0.477 | 2.2213 | 0.329 |
|                                                                                   |                                                                                   | 3 -0.372 | -0.070 | 4.4383 | 0.218 |
|                                                                                   |                                                                                   | 4 -0.221 | -0.193 | 5.6081 | 0.230 |
|                                                                                   |                                                                                   | 5 0.006  | -0.003 | 5.6096 | 0.346 |

The AC and PAC of ARIAM(1,2,2)

The cultivated land carrying capacity in Anhui:

First-order difference unit root test results of cultivated land carrying capacity in Anhui

|                                        | t-Statistic | Prob.*  |
|----------------------------------------|-------------|---------|
| Augmented Dickey-Fuller test statistic | -11.505     | 0.0001  |
| Test critical values:                  | 1% level    | -3.1095 |
|                                        | 5% level    | -2.0439 |
|                                        | 10% level   | -1.5973 |

| Autocorrelation                                                                     | Partial Correlation                                                                 | AC       | PAC    | Q-Stat | Prob  |
|-------------------------------------------------------------------------------------|-------------------------------------------------------------------------------------|----------|--------|--------|-------|
|  |  | 1 0.064  | 0.064  | 0.0393 | 0.843 |
|                                                                                     |                                                                                     | 2 0.007  | 0.003  | 0.0399 | 0.980 |
|                                                                                     |                                                                                     | 3 -0.121 | -0.122 | 0.2735 | 0.965 |
|                                                                                     |                                                                                     | 4 -0.229 | -0.218 | 1.5358 | 0.820 |
|                                                                                     |                                                                                     | 5 -0.221 | -0.210 | 3.8748 | 0.568 |

The AC and PAC of cultivated land carrying capacity in Anhui

| Autocorrelation                                                                     | Partial Correlation                                                                 | AC       | PAC    | Q-Stat | Prob  |
|-------------------------------------------------------------------------------------|-------------------------------------------------------------------------------------|----------|--------|--------|-------|
| 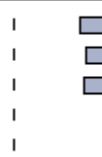 |  | 1 -0.224 | -0.224 | 0.4831 | 0.487 |
|                                                                                     |                                                                                     | 2 -0.156 | -0.217 | 0.7758 | 0.678 |
|                                                                                     |                                                                                     | 3 -0.174 | -0.294 | 1.2615 | 0.738 |
|                                                                                     |                                                                                     | 4 0.054  | -0.142 | 1.3304 | 0.856 |
|                                                                                     |                                                                                     | 5 0.001  | -0.152 | 1.3305 | 0.932 |

The AC and PAC of ARIAM(1,1,2)

The construction land carrying capacity in Anhui:

First-order difference unit root test results of construction land carrying capacity in Anhui

|                                        | t-Statistic | Prob.*  |
|----------------------------------------|-------------|---------|
| Augmented Dickey-Fuller test statistic | -43.4299    | 0.0001  |
| Test critical values:                  | 1% level    | -6.4236 |
|                                        | 5% level    | -3.9849 |
|                                        | 10% level   | -3.1206 |

| Autocorrelation                                                                   | Partial Correlation                                                               | AC | PAC    | Q-Stat | Prob   |       |
|-----------------------------------------------------------------------------------|-----------------------------------------------------------------------------------|----|--------|--------|--------|-------|
| 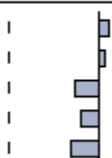 |  | 1  | 0.095  | 0.095  | 0.0873 | 0.768 |
|                                                                                   |                                                                                   | 2  | 0.043  | 0.034  | 0.1097 | 0.947 |
|                                                                                   |                                                                                   | 3  | -0.224 | -0.234 | 0.9131 | 0.822 |
|                                                                                   |                                                                                   | 4  | -0.164 | -0.130 | 1.5572 | 0.816 |
|                                                                                   |                                                                                   | 5  | -0.251 | -0.221 | 4.5717 | 0.470 |

The AC and PAC of construction land carrying capacity in Anhui

| Autocorrelation                                                                   | Partial Correlation                                                               | AC | PAC    | Q-Stat | Prob   |       |
|-----------------------------------------------------------------------------------|-----------------------------------------------------------------------------------|----|--------|--------|--------|-------|
|  |  | 1  | -0.100 | -0.100 | 0.0959 | 0.757 |
|                                                                                   |                                                                                   | 2  | -0.485 | -0.500 | 2.9149 | 0.233 |
|                                                                                   |                                                                                   | 3  | 0.017  | -0.142 | 2.9195 | 0.404 |
|                                                                                   |                                                                                   | 4  | 0.065  | -0.272 | 3.0205 | 0.554 |
|                                                                                   |                                                                                   | 5  | 0.003  | -0.140 | 3.0209 | 0.697 |

The AC and PAC of ARIAM(2,1,2)

The ecological land carrying capacity in Anhui:

First-order difference unit root test results of ecological land carrying capacity in Anhui

|                                        | t-Statistic | Prob.*  |
|----------------------------------------|-------------|---------|
| Augmented Dickey-Fuller test statistic | -8.4615     | 0.0001  |
| Test critical values:                  | 1% level    | -3.1095 |
|                                        | 5% level    | -2.0439 |
|                                        | 10% level   | -1.5973 |

| Autocorrelation                                                                     |                                                                                     | Partial Correlation |        | AC     | PAC    | Q-Stat | Prob |
|-------------------------------------------------------------------------------------|-------------------------------------------------------------------------------------|---------------------|--------|--------|--------|--------|------|
|  |  | 1                   | 0.080  | 0.080  | 0.0611 | 0.805  |      |
|  |  | 2                   | 0.001  | -0.006 | 0.0611 | 0.970  |      |
|  |  | 3                   | -0.130 | -0.130 | 0.3308 | 0.954  |      |
|  |  | 4                   | -0.213 | -0.197 | 1.4209 | 0.841  |      |
|  |  | 5                   | -0.237 | -0.223 | 4.1263 | 0.531  |      |

The AC and PAC of ecological land carrying capacity in Anhui

| Autocorrelation                                                                     | Partial Correlation                                                                 | AC | PAC    | Q-Stat | Prob   |       |
|-------------------------------------------------------------------------------------|-------------------------------------------------------------------------------------|----|--------|--------|--------|-------|
| 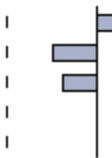 |  | 1  | 0.214  | 0.214  | 0.4417 | 0.506 |
|                                                                                     |                                                                                     | 2  | -0.402 | -0.470 | 2.3855 | 0.303 |
|                                                                                     |                                                                                     | 3  | -0.313 | -0.115 | 3.9574 | 0.266 |
|                                                                                     |                                                                                     | 4  | 0.001  | -0.091 | 3.9574 | 0.412 |
|                                                                                     |                                                                                     | 5  | 0.000  | -0.228 | 3.9574 | 0.556 |

The AC and PAC of ARIAM(2,1,1)

The cultivated land carrying capacity in Fujian:

Second-order difference unit root test results of cultivated land carrying capacity in Fujian

|                                        | t-Statistic | Prob.*  |
|----------------------------------------|-------------|---------|
| Augmented Dickey-Fuller test statistic | -8.9782     | 0.0003  |
| Test critical values:                  | 1% level    | -3.5639 |
|                                        | 5% level    | -2.1574 |
|                                        | 10% level   | -1.6104 |

| Autocorrelation                                                                   | Partial Correlation                                                               | AC       | PAC    | Q-Stat | Prob  |
|-----------------------------------------------------------------------------------|-----------------------------------------------------------------------------------|----------|--------|--------|-------|
| 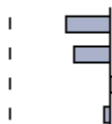 |  | 1 -0.408 | -0.408 | 1.4581 | 0.227 |
|                                                                                   |                                                                                   | 2 -0.331 | -0.597 | 2.7375 | 0.254 |
|                                                                                   |                                                                                   | 3 0.303  | -0.292 | 4.3454 | 0.227 |
|                                                                                   |                                                                                   | 4 -0.064 | -0.395 | 4.4875 | 0.344 |

The AC and PAC of cultivated land carrying capacity in Fujian

| Autocorrelation                                                                   | Partial Correlation                                                               | AC       | PAC    | Q-Stat | Prob  |
|-----------------------------------------------------------------------------------|-----------------------------------------------------------------------------------|----------|--------|--------|-------|
| 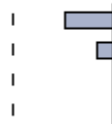 |  | 1 -0.437 | -0.437 | 1.6714 | 0.196 |
|                                                                                   |                                                                                   | 2 -0.147 | -0.418 | 1.9252 | 0.382 |
|                                                                                   |                                                                                   | 3 0.084  | -0.285 | 2.0481 | 0.562 |
|                                                                                   |                                                                                   | 4 0.001  | -0.245 | 2.0481 | 0.727 |

The AC and PAC of ARIAM(1,2,1)

The construction land carrying capacity in Fujian:

First-order difference unit root test results of construction land carrying capacity in Fujian

|                                        | t-Statistic | Prob.*  |
|----------------------------------------|-------------|---------|
| Augmented Dickey-Fuller test statistic | -3.7335     | 0.0398  |
| Test critical values:                  | 1% level    | -5.1198 |
|                                        | 5% level    | -3.5195 |
|                                        | 10% level   | -2.8984 |

| Autocorrelation                                                                     | Partial Correlation                                                                 | AC       | PAC    | Q-Stat | Prob  |
|-------------------------------------------------------------------------------------|-------------------------------------------------------------------------------------|----------|--------|--------|-------|
|  |  | 1 0.071  | 0.071  | 0.0484 | 0.826 |
|                                                                                     |                                                                                     | 2 -0.139 | -0.144 | 0.2791 | 0.870 |
|                                                                                     |                                                                                     | 3 0.195  | 0.222  | 0.8871 | 0.829 |
|                                                                                     |                                                                                     | 4 -0.341 | -0.434 | 3.6825 | 0.451 |
|                                                                                     |                                                                                     | 5 -0.286 | -0.134 | 7.6107 | 0.179 |

The AC and PAC of construction land carrying capacity in Fujian

| Autocorrelation                                                                     | Partial Correlation                                                                 | AC       | PAC    | Q-Stat | Prob  |
|-------------------------------------------------------------------------------------|-------------------------------------------------------------------------------------|----------|--------|--------|-------|
| 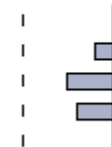 |  | 1 0.388  | 0.388  | 1.4485 | 0.229 |
|                                                                                     |                                                                                     | 2 -0.161 | -0.367 | 1.7595 | 0.415 |
|                                                                                     |                                                                                     | 3 -0.418 | -0.259 | 4.5601 | 0.207 |
|                                                                                     |                                                                                     | 4 -0.322 | -0.111 | 7.0473 | 0.133 |
|                                                                                     |                                                                                     | 5 0.013  | 0.068  | 7.0553 | 0.217 |

The AC and PAC of ARIAM(1,1,1)

The ecological land carrying capacity in Fujian:

First-order difference unit root test results of ecological land carrying capacity in Fujian

|                                        | t-Statistic | Prob.*  |
|----------------------------------------|-------------|---------|
| Augmented Dickey-Fuller test statistic | -2.7008     | 0.0250  |
| Test critical values:                  | 1% level    | -3.5639 |
|                                        | 5% level    | -2.1574 |
|                                        | 10% level   | -1.6104 |

| Autocorrelation                                                                   | Partial Correlation                                                               | AC       | PAC    | Q-Stat | Prob  |
|-----------------------------------------------------------------------------------|-----------------------------------------------------------------------------------|----------|--------|--------|-------|
|  |  | 1 0.587  | 0.587  | 3.6145 | 0.057 |
|  |  | 2 0.144  | -0.306 | 3.8741 | 0.144 |
|  |  | 3 -0.136 | -0.112 | 4.1663 | 0.244 |
|  |  | 4 -0.355 | -0.269 | 6.8121 | 0.146 |
|  |  | 5 -0.456 | -0.182 | 13.353 | 0.020 |
|  |  | 6 -0.283 | 0.099  | 18.413 | 0.005 |

The AC and PAC of ecological land carrying capacity in Fujian

| Autocorrelation                                                                   | Partial Correlation                                                               | AC       | PAC    | Q-Stat | Prob  |
|-----------------------------------------------------------------------------------|-----------------------------------------------------------------------------------|----------|--------|--------|-------|
|  |  | 1 0.024  | 0.024  | 0.0053 | 0.942 |
|  |  | 2 -0.212 | -0.213 | 0.5444 | 0.762 |
|  |  | 3 -0.036 | -0.026 | 0.5651 | 0.904 |
|  |  | 4 -0.280 | -0.340 | 2.4533 | 0.653 |
|  |  | 5 0.005  | 0.003  | 2.4544 | 0.783 |

The AC and PAC of ARIAM(1,1,3)

The cultivated land carrying capacity in Guangdong:

First-order difference unit root test results of cultivated land carrying capacity in Guangdong

|                                        | t-Statistic | Prob.*  |
|----------------------------------------|-------------|---------|
| Augmented Dickey-Fuller test statistic | -2.4808     | 0.0250  |
| Test critical values:                  | 1% level    | -3.1095 |
|                                        | 5% level    | -2.0439 |
|                                        | 10% level   | -1.5973 |

| Autocorrelation                                                                     | Partial Correlation                                                                 | AC       | PAC    | Q-Stat | Prob  |
|-------------------------------------------------------------------------------------|-------------------------------------------------------------------------------------|----------|--------|--------|-------|
| 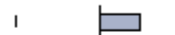 |  | 1 0.359  | 0.359  | 1.3529 | 0.245 |
|  |  | 2 -0.124 | -0.290 | 1.5461 | 0.462 |
|  |  | 3 -0.387 | -0.282 | 3.9012 | 0.272 |
|  |  | 4 -0.388 | -0.216 | 7.0578 | 0.133 |
|  |  | 5 0.011  | 0.162  | 7.0619 | 0.216 |
|  |  | 6 0.028  | -0.286 | 7.1110 | 0.311 |

The AC and PAC of cultivated land carrying capacity in Guangdong

| Autocorrelation                                                                     | Partial Correlation                                                                 | AC       | PAC    | Q-Stat | Prob  |
|-------------------------------------------------------------------------------------|-------------------------------------------------------------------------------------|----------|--------|--------|-------|
|  |  | 1 -0.066 | -0.066 | 0.0416 | 0.838 |
|  |  | 2 -0.437 | -0.443 | 2.3348 | 0.311 |
|  |  | 3 -0.253 | -0.405 | 3.3576 | 0.340 |
|  |  | 4 0.259  | -0.071 | 4.9691 | 0.290 |
|  |  | 5 -0.003 | -0.368 | 4.9697 | 0.420 |

The AC and PAC of ARIAM(1,1,2)

The construction land carrying capacity in Guangdong:

Second-order difference unit root test results of construction land carrying capacity in Guangdong

|                                        | t-Statistic | Prob.*  |
|----------------------------------------|-------------|---------|
| Augmented Dickey-Fuller test statistic | -7.3863     | 0.0016  |
| Test critical values:                  | 1% level    | -5.1198 |
|                                        | 5% level    | -3.5195 |
|                                        | 10% level   | -2.8984 |

| Autocorrelation                                                                   | Partial Correlation                                                               | AC       | PAC    | Q-Stat | Prob  |
|-----------------------------------------------------------------------------------|-----------------------------------------------------------------------------------|----------|--------|--------|-------|
| 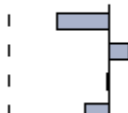 |  | 1 -0.463 | -0.463 | 1.8747 | 0.171 |
|  |  | 2 0.184  | -0.038 | 2.2713 | 0.321 |
|  |  | 3 -0.011 | 0.077  | 2.2734 | 0.518 |
|  |  | 4 -0.211 | -0.231 | 3.8267 | 0.430 |

The AC and PAC of construction land carrying capacity in Guangdong

| Autocorrelation                                                                   | Partial Correlation                                                               | AC       | PAC    | Q-Stat | Prob  |
|-----------------------------------------------------------------------------------|-----------------------------------------------------------------------------------|----------|--------|--------|-------|
|  |  | 1 -0.353 | -0.353 | 1.1962 | 0.274 |
|  |  | 2 0.036  | -0.102 | 1.2115 | 0.546 |
|  |  | 3 -0.302 | -0.373 | 2.6670 | 0.446 |
|  |  | 4 0.119  | -0.178 | 3.0069 | 0.557 |
|  |  | 5 -0.000 | -0.105 | 3.0069 | 0.699 |

The AC and PAC of ARIAM(1,2,1)

The ecological land carrying capacity in Guangdong:

First-order difference unit root test results of ecological land carrying capacity in Guangdong

|                                        | t-Statistic | Prob.*  |
|----------------------------------------|-------------|---------|
| Augmented Dickey-Fuller test statistic | -5.7167     | 0.0005  |
| Test critical values:                  | 1% level    | -3.1095 |
|                                        | 5% level    | -2.0439 |
|                                        | 10% level   | -1.5973 |

| Autocorrelation                                                                     | Partial Correlation                                                                 | AC       | PAC    | Q-Stat | Prob  |
|-------------------------------------------------------------------------------------|-------------------------------------------------------------------------------------|----------|--------|--------|-------|
|  |  | 1 0.235  | 0.235  | 0.5784 | 0.447 |
|  |  | 2 0.072  | 0.018  | 0.6432 | 0.725 |
|  |  | 3 -0.065 | -0.090 | 0.7094 | 0.871 |
|  |  | 4 -0.137 | -0.111 | 1.1055 | 0.893 |
|  |  | 5 -0.244 | -0.195 | 2.9841 | 0.702 |
|  |  | 6 -0.360 | -0.292 | 11.148 | 0.084 |

The AC and PAC of ecological land carrying capacity in Guangdong

| Autocorrelation                                                                     | Partial Correlation                                                                 | AC       | PAC    | Q-Stat | Prob  |
|-------------------------------------------------------------------------------------|-------------------------------------------------------------------------------------|----------|--------|--------|-------|
|  |  | 1 -0.167 | -0.167 | 0.2673 | 0.605 |
|  |  | 2 -0.523 | -0.566 | 3.5459 | 0.170 |
|  |  | 3 0.152  | -0.120 | 3.9143 | 0.271 |
|  |  | 4 0.046  | -0.364 | 3.9644 | 0.411 |
|  |  | 5 -0.008 | -0.094 | 3.9674 | 0.554 |

The AC and PAC of ARIAM(2,1,1)

The cultivated land carrying capacity in Gansu:

First-order difference unit root test results of cultivated land carrying capacity in Gansu

|                                        | t-Statistic | Prob.*  |
|----------------------------------------|-------------|---------|
| Augmented Dickey-Fuller test statistic | -2.5116     | 0.0267  |
| Test critical values:                  | 1% level    | -3.2714 |
|                                        | 5% level    | -2.0823 |
|                                        | 10% level   | -1.5998 |

| Autocorrelation                                                                   | Partial Correlation                                                               | AC       | PAC    | Q-Stat | Prob  |
|-----------------------------------------------------------------------------------|-----------------------------------------------------------------------------------|----------|--------|--------|-------|
| 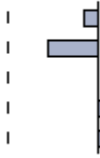 |  | 1 -0.139 | -0.139 | 0.1855 | 0.667 |
|                                                                                   |                                                                                   | 2 -0.453 | -0.482 | 2.6503 | 0.266 |
|                                                                                   |                                                                                   | 3 0.002  | -0.211 | 2.6504 | 0.449 |
|                                                                                   |                                                                                   | 4 0.036  | -0.320 | 2.6818 | 0.612 |
|                                                                                   |                                                                                   | 5 0.054  | -0.179 | 2.8233 | 0.727 |

The AC and PAC of cultivated land carrying capacity in Gansu

| Autocorrelation                                                                   | Partial Correlation                                                               | AC       | PAC    | Q-Stat | Prob  |
|-----------------------------------------------------------------------------------|-----------------------------------------------------------------------------------|----------|--------|--------|-------|
| 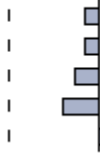 |  | 1 -0.124 | -0.124 | 0.1475 | 0.701 |
|                                                                                   |                                                                                   | 2 -0.138 | -0.156 | 0.3777 | 0.828 |
|                                                                                   |                                                                                   | 3 -0.216 | -0.265 | 1.1214 | 0.772 |
|                                                                                   |                                                                                   | 4 -0.334 | -0.486 | 3.7998 | 0.434 |
|                                                                                   |                                                                                   | 5 0.312  | 0.052  | 8.4759 | 0.132 |

The AC and PAC of ARIAM3,1,1)

The construction land carrying capacity in Gansu:

First-order difference unit root test results of construction land carrying capacity in Gansu

|                                        | t-Statistic       | Prob.* |
|----------------------------------------|-------------------|--------|
| Augmented Dickey-Fuller test statistic | -3.0250           | 0.0956 |
| Test critical values:                  | 1% level -5.6046  |        |
|                                        | 5% level -3.6948  |        |
|                                        | 10% level -2.9828 |        |

| Autocorrelation                                                                     | Partial Correlation                                                                 | AC       | PAC    | Q-Stat | Prob  |
|-------------------------------------------------------------------------------------|-------------------------------------------------------------------------------------|----------|--------|--------|-------|
|  |  | 1 -0.280 | -0.280 | 0.7519 | 0.386 |
|                                                                                     |                                                                                     | 2 0.111  | 0.035  | 0.8986 | 0.638 |
|                                                                                     |                                                                                     | 3 -0.393 | -0.384 | 3.3664 | 0.339 |
|                                                                                     |                                                                                     | 4 -0.026 | -0.289 | 3.3828 | 0.496 |
|                                                                                     |                                                                                     | 5 0.088  | 0.019  | 3.7556 | 0.585 |

The AC and PAC of construction land carrying capacity in Gansu

| Autocorrelation                                                                     | Partial Correlation                                                                 | AC       | PAC    | Q-Stat | Prob  |
|-------------------------------------------------------------------------------------|-------------------------------------------------------------------------------------|----------|--------|--------|-------|
|  |  | 1 -0.516 | -0.516 | 2.5547 | 0.110 |
|                                                                                     |                                                                                     | 2 -0.042 | -0.420 | 2.5760 | 0.276 |
|                                                                                     |                                                                                     | 3 0.070  | -0.294 | 2.6537 | 0.448 |
|                                                                                     |                                                                                     | 4 -0.009 | -0.232 | 2.6558 | 0.617 |
|                                                                                     |                                                                                     | 5 -0.002 | -0.186 | 2.6561 | 0.753 |

The AC and PAC of ARIAM(1,1,2)

The ecological land carrying capacity in Gansu:

Second-order difference unit root test results of ecological land carrying capacity in Gansu

|                                        | t-Statistic       | Prob.* |
|----------------------------------------|-------------------|--------|
| Augmented Dickey-Fuller test statistic | -1.6462           | 0.0926 |
| Test critical values:                  | 1% level -3.1095  |        |
|                                        | 5% level -2.0439  |        |
|                                        | 10% level -1.5973 |        |



| Autocorrelation                                                                   | Partial Correlation                                                               | AC       | PAC    | Q-Stat | Prob  |
|-----------------------------------------------------------------------------------|-----------------------------------------------------------------------------------|----------|--------|--------|-------|
| 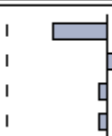 |  | 1 -0.490 | -0.490 | 2.0980 | 0.147 |
|                                                                                   |                                                                                   | 2 0.126  | -0.149 | 2.2840 | 0.319 |
|                                                                                   |                                                                                   | 3 -0.069 | -0.096 | 2.3680 | 0.500 |
|                                                                                   |                                                                                   | 4 -0.067 | -0.175 | 2.5268 | 0.640 |

The AC and PAC of ecological land carrying capacity in Gansu

| Autocorrelation                                                                   | Partial Correlation                                                               | AC       | PAC    | Q-Stat | Prob  |
|-----------------------------------------------------------------------------------|-----------------------------------------------------------------------------------|----------|--------|--------|-------|
| 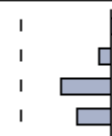 |  | 1 0.354  | 0.354  | 1.2051 | 0.272 |
|                                                                                   |                                                                                   | 2 -0.105 | -0.263 | 1.3369 | 0.512 |
|                                                                                   |                                                                                   | 3 -0.457 | -0.389 | 4.6757 | 0.197 |
|                                                                                   |                                                                                   | 4 -0.299 | -0.018 | 6.8202 | 0.146 |
|                                                                                   |                                                                                   | 5 0.006  | 0.047  | 6.8220 | 0.234 |

The AC and PAC of ARIAM(1,2,1)

The cultivated land carrying capacity in Guangxi:

Second-order difference unit root test results of cultivated land carrying capacity in Guangxi

|                                        | t-Statistic | Prob.*  |
|----------------------------------------|-------------|---------|
| Augmented Dickey-Fuller test statistic | -2.1100     | 0.0538  |
| Test critical values:                  | 1% level    | -3.5639 |
|                                        | 5% level    | -2.1574 |
|                                        | 10% level   | -1.6104 |

| Autocorrelation                                                                     | Partial Correlation                                                                 | AC       | PAC    | Q-Stat | Prob  |
|-------------------------------------------------------------------------------------|-------------------------------------------------------------------------------------|----------|--------|--------|-------|
| 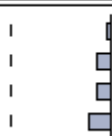 |  | 1 -0.048 | -0.048 | 0.0198 | 0.888 |
|                                                                                     |                                                                                     | 2 -0.136 | -0.139 | 0.2370 | 0.888 |
|                                                                                     |                                                                                     | 3 -0.125 | -0.142 | 0.5096 | 0.917 |
|                                                                                     |                                                                                     | 4 -0.191 | -0.237 | 1.7890 | 0.774 |

The AC and PAC of cultivated land carrying capacity in Guangxi

| Autocorrelation                                                                     | Partial Correlation                                                                 | AC       | PAC    | Q-Stat | Prob  |
|-------------------------------------------------------------------------------------|-------------------------------------------------------------------------------------|----------|--------|--------|-------|
| 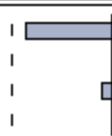 |  | 1 -0.783 | -0.783 | 5.3648 | 0.021 |
|                                                                                     |                                                                                     | 2 0.366  | -0.639 | 6.9278 | 0.031 |
|                                                                                     |                                                                                     | 3 -0.085 | -0.505 | 7.0551 | 0.070 |
|                                                                                     |                                                                                     | 4 0.002  | -0.347 | 7.0552 | 0.133 |

The AC and PAC of ARIAM(1,2,1)

The construction land carrying capacity in Guangxi:

First-order difference unit root test results of construction land carrying capacity in Guangxi

|                                        | t-Statistic | Prob.*  |
|----------------------------------------|-------------|---------|
| Augmented Dickey-Fuller test statistic | -1.9411     | 0.0610  |
| Test critical values:                  | 1% level    | -3.2714 |
|                                        | 5% level    | -2.0823 |
|                                        | 10% level   | -1.5998 |

| Autocorrelation                                                                   | Partial Correlation                                                               | AC       | PAC    | Q-Stat | Prob  |
|-----------------------------------------------------------------------------------|-----------------------------------------------------------------------------------|----------|--------|--------|-------|
| 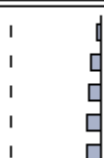 |  | 1 -0.045 | -0.045 | 0.0194 | 0.889 |
|                                                                                   |                                                                                   | 2 -0.082 | -0.085 | 0.1008 | 0.951 |
|                                                                                   |                                                                                   | 3 -0.106 | -0.114 | 0.2790 | 0.964 |
|                                                                                   |                                                                                   | 4 -0.131 | -0.153 | 0.6880 | 0.953 |
|                                                                                   |                                                                                   | 5 -0.137 | -0.183 | 1.5837 | 0.903 |

The AC and PAC of construction land carrying capacity in Guangxi

| Autocorrelation                                                                   | Partial Correlation                                                               | AC       | PAC    | Q-Stat | Prob  |
|-----------------------------------------------------------------------------------|-----------------------------------------------------------------------------------|----------|--------|--------|-------|
|  |  | 1 0.279  | 0.279  | 0.7467 | 0.388 |
|                                                                                   |                                                                                   | 2 -0.425 | -0.545 | 2.9129 | 0.233 |
|                                                                                   |                                                                                   | 3 -0.337 | -0.003 | 4.7281 | 0.193 |
|                                                                                   |                                                                                   | 4 -0.017 | -0.159 | 4.7353 | 0.316 |
|                                                                                   |                                                                                   | 5 0.000  | -0.210 | 4.7353 | 0.449 |

The AC and PAC of ARIAM(1,1,2)

The ecological land carrying capacity in Guangxi:

First-order difference unit root test results of ecological land carrying capacity in Guangxi

|                                        | t-Statistic | Prob.*  |
|----------------------------------------|-------------|---------|
| Augmented Dickey-Fuller test statistic | -24.933     | 0.0001  |
| Test critical values:                  | 1% level    | -3.1095 |
|                                        | 5% level    | -2.0439 |
|                                        | 10% level   | -1.5973 |

| Autocorrelation                                                                     | Partial Correlation                                                                 | AC       | PAC    | Q-Stat | Prob  |
|-------------------------------------------------------------------------------------|-------------------------------------------------------------------------------------|----------|--------|--------|-------|
|  |  | 1 -0.036 | -0.036 | 0.0127 | 0.910 |
|                                                                                     |                                                                                     | 2 -0.061 | -0.062 | 0.0575 | 0.972 |
|                                                                                     |                                                                                     | 3 -0.110 | -0.115 | 0.2499 | 0.969 |
|                                                                                     |                                                                                     | 4 -0.123 | -0.139 | 0.6120 | 0.962 |
|                                                                                     |                                                                                     | 5 -0.170 | -0.206 | 1.9995 | 0.849 |

The AC and PAC of ecological land carrying capacity in Guangxi

| Autocorrelation                                                                     | Partial Correlation                                                                 | AC       | PAC    | Q-Stat | Prob  |
|-------------------------------------------------------------------------------------|-------------------------------------------------------------------------------------|----------|--------|--------|-------|
|  |  | 1 0.205  | 0.205  | 0.4044 | 0.525 |
|                                                                                     |                                                                                     | 2 -0.187 | -0.239 | 0.8252 | 0.662 |
|                                                                                     |                                                                                     | 3 -0.482 | -0.426 | 4.5369 | 0.209 |
|                                                                                     |                                                                                     | 4 -0.037 | 0.134  | 4.5699 | 0.334 |
|                                                                                     |                                                                                     | 5 0.001  | -0.217 | 4.5699 | 0.471 |

The AC and PAC of ARIAM(1,1,2)

The cultivated land carrying capacity in Guizhou:

First-order difference unit root test results of cultivated land carrying capacity in Guizhou

|                                        | t-Statistic | Prob.*  |
|----------------------------------------|-------------|---------|
| Augmented Dickey-Fuller test statistic | -11.574     | 0.0001  |
| Test critical values:                  | 1% level    | -3.1095 |
|                                        | 5% level    | -2.0439 |
|                                        | 10% level   | -1.5973 |

| Autocorrelation |                                                                                   | Partial Correlation |                                                                                   | AC | PAC             | Q-Stat | Prob. |
|-----------------|-----------------------------------------------------------------------------------|---------------------|-----------------------------------------------------------------------------------|----|-----------------|--------|-------|
|                 |  |                     |  |    | 1 0.173 0.173   | 0.2888 | 0.591 |
|                 |  |                     |  |    | 2 -0.128 -0.163 | 0.4844 | 0.785 |
|                 |  |                     |  |    | 3 -0.186 -0.140 | 1.0377 | 0.792 |
|                 |  |                     |  |    | 4 -0.131 -0.097 | 1.4468 | 0.836 |
|                 |  |                     |  |    | 5 -0.229 -0.255 | 3.9693 | 0.554 |

The AC and PAC of cultivated land carrying capacity in Guizhou

| Autocorrelation                                                                   | Partial Correlation                                                               | AC | PAC    | Q-Stat | Prob   |       |
|-----------------------------------------------------------------------------------|-----------------------------------------------------------------------------------|----|--------|--------|--------|-------|
| 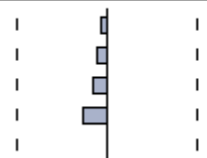 |  | 1  | -0.059 | -0.059 | 0.0339 | 0.854 |
|                                                                                   |                                                                                   | 2  | -0.098 | -0.102 | 0.1484 | 0.928 |
|                                                                                   |                                                                                   | 3  | -0.137 | -0.151 | 0.4481 | 0.930 |
|                                                                                   |                                                                                   | 4  | -0.206 | -0.246 | 1.4645 | 0.833 |
|                                                                                   |                                                                                   | 5  | -0.000 | -0.083 | 1.4645 | 0.917 |

The AC and PAC of ARIAM(3,1,1)

The construction land carrying capacity in Guizhou:

First-order difference unit root test results of construction land carrying capacity in Guizhou

|                                        | t-Statistic | Prob.*  |
|----------------------------------------|-------------|---------|
| Augmented Dickey-Fuller test statistic | -3.4282     | 0.0083  |
| Test critical values:                  | 1% level    | -3.2714 |
|                                        | 5% level    | -2.0823 |
|                                        | 10% level   | -1.5998 |

| Autocorrelation |                                                                                     | Partial Correlation |                                                                                     | AC | PAC    | Q-Stat | Prob   |       |
|-----------------|-------------------------------------------------------------------------------------|---------------------|-------------------------------------------------------------------------------------|----|--------|--------|--------|-------|
|                 |  |                     |  | 1  | -0.199 | -0.199 | 0.3813 | 0.537 |
|                 |  |                     |  | 2  | 0.125  | 0.088  | 0.5675 | 0.753 |
|                 |  |                     |  | 3  | -0.108 | -0.072 | 0.7555 | 0.860 |
|                 |  |                     |  | 4  | -0.079 | -0.128 | 0.9050 | 0.924 |
|                 |  |                     |  | 5  | -0.238 | -0.276 | 3.6236 | 0.605 |

The AC and PAC of construction land carrying capacity in Guizhou

| Autocorrelation                                                                     | Partial Correlation                                                                 | AC | PAC    | Q-Stat | Prob.  |       |
|-------------------------------------------------------------------------------------|-------------------------------------------------------------------------------------|----|--------|--------|--------|-------|
| 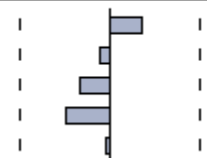 |  | 1  | 0.287  | 0.287  | 0.7929 | 0.373 |
|                                                                                     |                                                                                     | 2  | -0.083 | -0.181 | 0.8759 | 0.645 |
|                                                                                     |                                                                                     | 3  | -0.270 | -0.214 | 2.0431 | 0.564 |
|                                                                                     |                                                                                     | 4  | -0.405 | -0.320 | 5.9767 | 0.201 |
|                                                                                     |                                                                                     | 5  | -0.029 | 0.143  | 6.0179 | 0.304 |

The AC and PAC of ARIAM(2,1,2)

The ecological land carrying capacity in Guizhou:

First-order difference unit root test results of ecological land carrying capacity in Guizhou

|                                        | t-Statistic | Prob.*  |
|----------------------------------------|-------------|---------|
| Augmented Dickey-Fuller test statistic | -9.3529     | 0.0001  |
| Test critical values:                  | 1% level    | -3.1095 |
|                                        | 5% level    | -2.0439 |
|                                        | 10% level   | -1.5973 |

| Autocorrelation                                                                   | Partial Correlation                                                               | AC       | PAC    | Q-Stat | Prob  |
|-----------------------------------------------------------------------------------|-----------------------------------------------------------------------------------|----------|--------|--------|-------|
|  |  | 1 0.187  | 0.187  | 0.3355 | 0.562 |
|                                                                                   |                                                                                   | 2 -0.137 | -0.178 | 0.5594 | 0.756 |
|                                                                                   |                                                                                   | 3 -0.173 | -0.117 | 1.0369 | 0.792 |
|                                                                                   |                                                                                   | 4 -0.127 | -0.100 | 1.4268 | 0.840 |
|                                                                                   |                                                                                   | 5 -0.250 | -0.274 | 4.4299 | 0.489 |

The AC and PAC of ecological land carrying capacity in Guizhou

| Autocorrelation                                                                   | Partial Correlation                                                               | AC       | PAC    | Q-Stat | Prob  |
|-----------------------------------------------------------------------------------|-----------------------------------------------------------------------------------|----------|--------|--------|-------|
|  |  | 1 0.240  | 0.240  | 0.5551 | 0.456 |
|                                                                                   |                                                                                   | 2 -0.188 | -0.261 | 0.9784 | 0.613 |
|                                                                                   |                                                                                   | 3 -0.324 | -0.233 | 2.6582 | 0.447 |
|                                                                                   |                                                                                   | 4 -0.228 | -0.156 | 3.9105 | 0.418 |
|                                                                                   |                                                                                   | 5 -0.000 | -0.029 | 3.9105 | 0.562 |

The AC and PAC of ARIAM(1,1,1)

The cultivated land carrying capacity in Hainan:

Second-order difference unit root test results of cultivated land carrying capacity in Hainan

|                                        | t-Statistic | Prob.*  |
|----------------------------------------|-------------|---------|
| Augmented Dickey-Fuller test statistic | -8.0034     | 0.0002  |
| Test critical values:                  | 1% level    | -3.2714 |
|                                        | 5% level    | -2.0823 |
|                                        | 10% level   | -1.5998 |

| Autocorrelation                                                                     | Partial Correlation                                                                 | AC       | PAC    | Q-Stat | Prob  |
|-------------------------------------------------------------------------------------|-------------------------------------------------------------------------------------|----------|--------|--------|-------|
|  |  | 1 -0.233 | -0.233 | 0.4763 | 0.490 |
|                                                                                     |                                                                                     | 2 -0.117 | -0.181 | 0.6351 | 0.728 |
|                                                                                     |                                                                                     | 3 0.072  | -0.003 | 0.7251 | 0.867 |
|                                                                                     |                                                                                     | 4 -0.222 | -0.245 | 2.4459 | 0.654 |

The AC and PAC of cultivated land carrying capacity in Hainan

| Autocorrelation                                                                     | Partial Correlation                                                                 | AC       | PAC    | Q-Stat | Prob  |
|-------------------------------------------------------------------------------------|-------------------------------------------------------------------------------------|----------|--------|--------|-------|
| 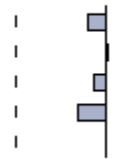 |  | 1 -0.157 | -0.157 | 0.2376 | 0.626 |
|                                                                                     |                                                                                     | 2 0.016  | -0.009 | 0.2405 | 0.887 |
|                                                                                     |                                                                                     | 3 -0.101 | -0.102 | 0.4035 | 0.940 |
|                                                                                     |                                                                                     | 4 -0.259 | -0.301 | 2.0141 | 0.733 |
|                                                                                     |                                                                                     | 5 0.002  | -0.110 | 2.0142 | 0.847 |

The AC and PAC of ARIAM(1,2,1)

The construction land carrying capacity in Hainan:

First-order difference unit root test results of construction land carrying capacity in Hainan

|                                        | t-Statistic | Prob.*  |
|----------------------------------------|-------------|---------|
| Augmented Dickey-Fuller test statistic | -1.9232     | 0.0602  |
| Test critical values:                  | 1% level    | -3.1095 |
|                                        | 5% level    | -2.0439 |
|                                        | 10% level   | -1.5973 |

| Autocorrelation                                                                   |                                                                                   | Partial Correlation |        | AC     | PAC    | Q-Stat | Prob |
|-----------------------------------------------------------------------------------|-----------------------------------------------------------------------------------|---------------------|--------|--------|--------|--------|------|
| 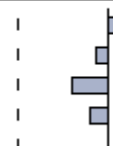 |  | 1                   | 0.096  | 0.096  | 0.0879 | 0.767  |      |
|                                                                                   |                                                                                   | 2                   | -0.107 | -0.117 | 0.2256 | 0.893  |      |
|                                                                                   |                                                                                   | 3                   | -0.326 | -0.310 | 1.9237 | 0.588  |      |
|                                                                                   |                                                                                   | 4                   | -0.164 | -0.136 | 2.5660 | 0.633  |      |
|                                                                                   |                                                                                   | 5                   | 0.001  | -0.052 | 2.5660 | 0.767  |      |

The AC and PAC of construction land carrying capacity in Hainan

| Autocorrelation                                                                   | Partial Correlation                                                               | AC | PAC    | Q-Stat | Prob   |       |
|-----------------------------------------------------------------------------------|-----------------------------------------------------------------------------------|----|--------|--------|--------|-------|
| 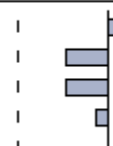 |  | 1  | 0.360  | 0.360  | 1.2451 | 0.264 |
|                                                                                   |                                                                                   | 2  | -0.377 | -0.582 | 2.9488 | 0.229 |
|                                                                                   |                                                                                   | 3  | -0.372 | 0.091  | 5.1643 | 0.160 |
|                                                                                   |                                                                                   | 4  | -0.112 | -0.265 | 5.4630 | 0.243 |
|                                                                                   |                                                                                   | 5  | 0.000  | -0.064 | 5.4630 | 0.362 |

The AC and PAC of ARIAM(1,1,3)

The ecological land carrying capacity in Hainan:

Second-order difference unit root test results of ecological land carrying capacity in Hainan

|                                        | t-Statistic | Prob.*  |
|----------------------------------------|-------------|---------|
| Augmented Dickey-Fuller test statistic | -2.0977     | 0.0492  |
| Test critical values:                  | 1% level    | -3.2714 |
|                                        | 5% level    | -2.0823 |
|                                        | 10% level   | -1.5998 |

| Autocorrelation                                                                     | Partial Correlation                                                                 | AC | PAC    | Q-Stat | Prob.  |       |
|-------------------------------------------------------------------------------------|-------------------------------------------------------------------------------------|----|--------|--------|--------|-------|
| 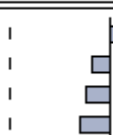 |  | 1  | 0.141  | 0.141  | 0.1741 | 0.677 |
|                                                                                     |                                                                                     | 2  | -0.157 | -0.181 | 0.4621 | 0.794 |
|                                                                                     |                                                                                     | 3  | -0.215 | -0.172 | 1.2689 | 0.737 |
|                                                                                     |                                                                                     | 4  | -0.269 | -0.261 | 3.8056 | 0.433 |

The AC and PAC of ecological land carrying capacity in Hainan

| Autocorrelation                                                                     | Partial Correlation                                                                 | AC | PAC    | Q-Stat | Prob   |       |
|-------------------------------------------------------------------------------------|-------------------------------------------------------------------------------------|----|--------|--------|--------|-------|
| 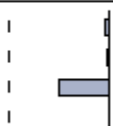 |  | 1  | -0.039 | -0.039 | 0.0133 | 0.908 |
|                                                                                     |                                                                                     | 2  | -0.021 | -0.022 | 0.0183 | 0.991 |
|                                                                                     |                                                                                     | 3  | -0.446 | -0.449 | 3.5008 | 0.321 |
|                                                                                     |                                                                                     | 4  | 0.006  | -0.044 | 3.5020 | 0.478 |

The AC and PAC of ARIAM(1,2,1)

The cultivated land carrying capacity in Hebei:

First-order difference unit root test results of cultivated land carrying capacity in Hebei

|                                        | t-Statistic | Prob.*  |
|----------------------------------------|-------------|---------|
| Augmented Dickey-Fuller test statistic | -8.2013     | 0.0001  |
| Test critical values:                  | 1% level    | -3.1095 |
|                                        | 5% level    | -2.0439 |
|                                        | 10% level   | -1.5973 |

| Autocorrelation |                                                                                   | Partial Correlation |                                                                                   | AC | PAC | Q-Stat | Prob   |        |       |
|-----------------|-----------------------------------------------------------------------------------|---------------------|-----------------------------------------------------------------------------------|----|-----|--------|--------|--------|-------|
|                 |  |                     |  |    | 1   | -0.194 | -0.194 | 0.3624 | 0.547 |
|                 |  |                     |  |    | 2   | -0.075 | -0.117 | 0.4301 | 0.806 |
|                 |  |                     |  |    | 3   | -0.063 | -0.108 | 0.4944 | 0.920 |
|                 |  |                     |  |    | 4   | 0.042  | -0.005 | 0.5364 | 0.970 |
|                 |  |                     |  |    | 5   | -0.209 | -0.232 | 2.6334 | 0.756 |

The AC and PAC of cultivated land carrying capacity in Hebei

| Autocorrelation                                                                   | Partial Correlation                                                               | AC | PAC    | Q-Stat | Prob   |       |
|-----------------------------------------------------------------------------------|-----------------------------------------------------------------------------------|----|--------|--------|--------|-------|
|  |  | 1  | -0.237 | -0.237 | 0.5371 | 0.464 |
|                                                                                   |                                                                                   | 2  | -0.393 | -0.475 | 2.3862 | 0.303 |
|                                                                                   |                                                                                   | 3  | 0.130  | -0.163 | 2.6568 | 0.448 |
|                                                                                   |                                                                                   | 4  | -0.002 | -0.273 | 2.6569 | 0.617 |
|                                                                                   |                                                                                   | 5  | 0.001  | -0.131 | 2.6570 | 0.753 |

The AC and PAC of ARIAM(2,1,2)

The construction land carrying capacity in Hebei:

Second-order difference unit root test results of construction land carrying capacity in Hebei

|                                        | t-Statistic | Prob.*  |
|----------------------------------------|-------------|---------|
| Augmented Dickey-Fuller test statistic | -3.7261     | 0.0059  |
| Test critical values:                  | 1% level    | -3.2714 |
|                                        | 5% level    | -2.0823 |
|                                        | 10% level   | -1.5998 |

| Autocorrelation                                                                     | Partial Correlation                                                                 | AC | PAC    | Q-Stat | Prob.  |       |
|-------------------------------------------------------------------------------------|-------------------------------------------------------------------------------------|----|--------|--------|--------|-------|
|  |  | 1  | -0.113 | -0.113 | 0.1116 | 0.738 |
|                                                                                     |                                                                                     | 2  | -0.327 | -0.344 | 1.3609 | 0.506 |
|                                                                                     |                                                                                     | 3  | -0.175 | -0.303 | 1.8981 | 0.594 |
|                                                                                     |                                                                                     | 4  | 0.115  | -0.116 | 2.3641 | 0.669 |

The AC and PAC of construction land carrying capacity in Hebei

| Autocorrelation                                                                     | Partial Correlation                                                                 | AC | PAC    | Q-Stat | Prob.  |       |
|-------------------------------------------------------------------------------------|-------------------------------------------------------------------------------------|----|--------|--------|--------|-------|
|  |  | 1  | -0.654 | -0.654 | 3.7377 | 0.053 |
|                                                                                     |  | 2  | 0.170  | -0.449 | 4.0755 | 0.130 |
|                                                                                     |  | 3  | -0.016 | -0.324 | 4.0800 | 0.253 |
|                                                                                     |  | 4  | -0.000 | -0.247 | 4.0800 | 0.395 |

The AC and PAC of ARIAM(1,2,1)

The ecological land carrying capacity in Hebei:

First-order difference unit root test results of ecological land carrying capacity in Hebei

|                                        | t-Statistic | Prob.*  |
|----------------------------------------|-------------|---------|
| Augmented Dickey-Fuller test statistic | -8.3626     | 0.0001  |
| Test critical values:                  | 1% level    | -3.1095 |
|                                        | 5% level    | -2.0439 |
|                                        | 10% level   | -1.5973 |

| Autocorrelation                                                                   | Partial Correlation                                                               | AC | PAC    | Q-Stat | Prob   |       |
|-----------------------------------------------------------------------------------|-----------------------------------------------------------------------------------|----|--------|--------|--------|-------|
|  |  | 1  | 0.058  | 0.058  | 0.0318 | 0.859 |
|                                                                                   |                                                                                   | 2  | -0.061 | -0.065 | 0.0770 | 0.962 |
|                                                                                   |                                                                                   | 3  | -0.122 | -0.115 | 0.3153 | 0.957 |
|                                                                                   |                                                                                   | 4  | -0.095 | -0.087 | 0.5314 | 0.970 |
|                                                                                   |                                                                                   | 5  | -0.279 | -0.293 | 4.2724 | 0.511 |

The AC and PAC of ecological land carrying capacity in Hebei

| Autocorrelation                                                                   | Partial Correlation                                                               | AC | PAC    | Q-Stat | Prob   |       |
|-----------------------------------------------------------------------------------|-----------------------------------------------------------------------------------|----|--------|--------|--------|-------|
|  |  | 1  | -0.246 | -0.246 | 0.5832 | 0.445 |
|                                                                                   |                                                                                   | 2  | -0.074 | -0.143 | 0.6483 | 0.723 |
|                                                                                   |                                                                                   | 3  | 0.236  | 0.195  | 1.5365 | 0.674 |
|                                                                                   |                                                                                   | 4  | -0.419 | -0.359 | 5.7559 | 0.218 |
|                                                                                   |                                                                                   | 5  | 0.004  | -0.163 | 5.7566 | 0.331 |

The AC and PAC of ARIAM(1,1,1)

The cultivated land carrying capacity in Henan:

First-order difference unit root test results of cultivated land carrying capacity in Henan

|                                        | t-Statistic | Prob.*  |
|----------------------------------------|-------------|---------|
| Augmented Dickey-Fuller test statistic | -9.1962     | 0.0001  |
| Test critical values:                  | 1% level    | -3.1095 |
|                                        | 5% level    | -2.0439 |
|                                        | 10% level   | -1.5973 |

| Autocorrelation                                                                     |  | Partial Correlation                                                                 |  | AC | PAC    | Q-Stat | Prob.  |       |
|-------------------------------------------------------------------------------------|--|-------------------------------------------------------------------------------------|--|----|--------|--------|--------|-------|
| 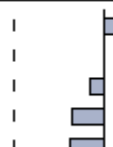 |  |  |  | 1  | 0.200  | 0.200  | 0.3825 | 0.536 |
|                                                                                     |  |                                                                                     |  | 2  | 0.004  | -0.037 | 0.3827 | 0.826 |
|                                                                                     |  |                                                                                     |  | 3  | -0.126 | -0.124 | 0.6365 | 0.888 |
|                                                                                     |  |                                                                                     |  | 4  | -0.279 | -0.242 | 2.5016 | 0.644 |
|                                                                                     |  |                                                                                     |  | 5  | -0.299 | -0.229 | 6.7856 | 0.237 |

The AC and PAC of cultivated land carrying capacity in Henan

| Autocorrelation                                                                     | Partial Correlation                                                                 | AC | PAC    | Q-Stat | Prob.  |       |
|-------------------------------------------------------------------------------------|-------------------------------------------------------------------------------------|----|--------|--------|--------|-------|
| 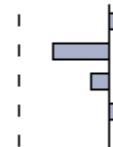 |  | 1  | 0.087  | 0.087  | 0.0724 | 0.788 |
|                                                                                     |                                                                                     | 2  | -0.511 | -0.523 | 3.2075 | 0.201 |
|                                                                                     |                                                                                     | 3  | -0.170 | -0.079 | 3.6700 | 0.299 |
|                                                                                     |                                                                                     | 4  | 0.097  | -0.198 | 3.8982 | 0.420 |
|                                                                                     |                                                                                     | 5  | -0.003 | -0.187 | 3.8986 | 0.564 |

The AC and PAC of ARIAM(1,1,1)

The construction land carrying capacity in Henan:

First-order difference unit root test results of construction land carrying capacity in Henan

|                                        | t-Statistic | Prob.*  |
|----------------------------------------|-------------|---------|
| Augmented Dickey-Fuller test statistic | -2.9419     | 0.0126  |
| Test critical values:                  | 1% level    | -3.1095 |
|                                        | 5% level    | -2.0439 |
|                                        | 10% level   | -1.5973 |

| Autocorrelation                                                                   | Partial Correlation                                                               | AC       | PAC    | Q-Stat | Prob  |
|-----------------------------------------------------------------------------------|-----------------------------------------------------------------------------------|----------|--------|--------|-------|
|  |  | 1 0.141  | 0.141  | 0.1898 | 0.663 |
|                                                                                   |                                                                                   | 2 -0.204 | -0.228 | 0.6880 | 0.709 |
|                                                                                   |                                                                                   | 3 0.146  | 0.229  | 1.0273 | 0.795 |
|                                                                                   |                                                                                   | 4 -0.276 | -0.449 | 2.8504 | 0.583 |
|                                                                                   |                                                                                   | 5 -0.307 | -0.042 | 7.3706 | 0.195 |

The AC and PAC of construction land carrying capacity in Henan

| Autocorrelation                                                                   | Partial Correlation                                                               | AC       | PAC    | Q-Stat | Prob  |
|-----------------------------------------------------------------------------------|-----------------------------------------------------------------------------------|----------|--------|--------|-------|
|  |  | 1 -0.459 | -0.459 | 2.0183 | 0.155 |
|                                                                                   |                                                                                   | 2 -0.155 | -0.462 | 2.3062 | 0.316 |
|                                                                                   |                                                                                   | 3 0.408  | 0.149  | 4.9761 | 0.174 |
|                                                                                   |                                                                                   | 4 -0.260 | -0.004 | 6.6016 | 0.158 |
|                                                                                   |                                                                                   | 5 -0.035 | -0.036 | 6.6598 | 0.247 |

The AC and PAC of ARIAM(1,1,2)

The ecological land carrying capacity in Henan:

| First-order difference unit root test results of ecological land carrying capacity in Henan |           |             |        |
|---------------------------------------------------------------------------------------------|-----------|-------------|--------|
|                                                                                             |           | t-Statistic | Prob.* |
| Augmented Dickey-Fuller test statistic                                                      |           | -8.8605     | 0.0001 |
| Test critical values:                                                                       | 1% level  | -3.1095     |        |
|                                                                                             | 5% level  | -2.0439     |        |
|                                                                                             | 10% level | -1.5973     |        |

| Autocorrelation                                                                     | Partial Correlation                                                                 | AC       | PAC    | Q-Stat | Prob  |
|-------------------------------------------------------------------------------------|-------------------------------------------------------------------------------------|----------|--------|--------|-------|
| 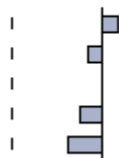 |  | 1 0.134  | 0.134  | 0.1730 | 0.677 |
|                                                                                     |                                                                                     | 2 -0.137 | -0.158 | 0.3985 | 0.819 |
|                                                                                     |                                                                                     | 3 -0.002 | 0.043  | 0.3985 | 0.941 |
|                                                                                     |                                                                                     | 4 -0.190 | -0.228 | 1.2623 | 0.868 |
|                                                                                     |                                                                                     | 5 -0.306 | -0.256 | 5.7548 | 0.331 |

The AC and PAC of ecological land carrying capacity in Henan

| Autocorrelation                                                                     | Partial Correlation                                                                 | AC       | PAC    | Q-Stat | Prob  |
|-------------------------------------------------------------------------------------|-------------------------------------------------------------------------------------|----------|--------|--------|-------|
| 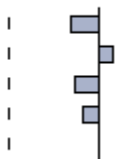 |  | 1 -0.246 | -0.246 | 0.5823 | 0.445 |
|                                                                                     |                                                                                     | 2 0.118  | 0.061  | 0.7495 | 0.687 |
|                                                                                     |                                                                                     | 3 -0.218 | -0.187 | 1.5070 | 0.681 |
|                                                                                     |                                                                                     | 4 -0.154 | -0.277 | 2.0753 | 0.722 |
|                                                                                     |                                                                                     | 5 -0.000 | -0.091 | 2.0753 | 0.839 |

The AC and PAC of ARIAM(2,1,1)

The cultivated land carrying capacity in Heilongjiang:

| First-order difference unit root test results of cultivated land carrying capacity in Heilongjiang |           |             |        |
|----------------------------------------------------------------------------------------------------|-----------|-------------|--------|
|                                                                                                    |           | t-Statistic | Prob.* |
| Augmented Dickey-Fuller test statistic                                                             |           | -6.4577     | 0.0002 |
| Test critical values:                                                                              | 1% level  | -3.0074     |        |
|                                                                                                    | 5% level  | -2.0211     |        |
|                                                                                                    | 10% level | -1.5972     |        |



| Autocorrelation                                                                   | Partial Correlation                                                               | AC | PAC    | Q-Stat | Prob.  |       |
|-----------------------------------------------------------------------------------|-----------------------------------------------------------------------------------|----|--------|--------|--------|-------|
|  |  | 1  | 0.097  | 0.097  | 0.0894 | 0.765 |
|                                                                                   |                                                                                   | 2  | -0.008 | -0.018 | 0.0903 | 0.956 |
|                                                                                   |                                                                                   | 3  | -0.074 | -0.072 | 0.1778 | 0.981 |
|                                                                                   |                                                                                   | 4  | -0.359 | -0.350 | 3.2661 | 0.514 |
|                                                                                   |                                                                                   | 5  | -0.156 | -0.113 | 4.4268 | 0.490 |

The AC and PAC of cultivated land carrying capacity in Heilongjiang

| Autocorrelation                                                                   | Partial Correlation                                                               | AC | PAC    | Q-Stat | Prob   |       |
|-----------------------------------------------------------------------------------|-----------------------------------------------------------------------------------|----|--------|--------|--------|-------|
| 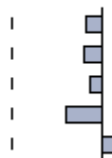 |  | 1  | -0.146 | -0.146 | 0.2045 | 0.651 |
|                                                                                   |                                                                                   | 2  | -0.166 | -0.191 | 0.5335 | 0.766 |
|                                                                                   |                                                                                   | 3  | -0.113 | -0.179 | 0.7362 | 0.865 |
|                                                                                   |                                                                                   | 4  | -0.326 | -0.451 | 3.2811 | 0.512 |
|                                                                                   |                                                                                   | 5  | 0.250  | 0.011  | 6.2747 | 0.280 |

The AC and PAC of ARIAM(3,1,1)

The construction land carrying capacity in Heilongjiang:

First-order difference unit root test results of construction land carrying capacity in Heilongjiang

|                                        | t-Statistic | Prob.*  |
|----------------------------------------|-------------|---------|
| Augmented Dickey-Fuller test statistic | -2.6741     | 0.0258  |
| Test critical values:                  | 1% level    | -3.5639 |
|                                        | 5% level    | -2.1574 |
|                                        | 10% level   | -1.6104 |

| Autocorrelation                                                                     |                                                                                     | Partial Correlation |        | AC     | PAC    | Q-Stat | Prob. |
|-------------------------------------------------------------------------------------|-------------------------------------------------------------------------------------|---------------------|--------|--------|--------|--------|-------|
| 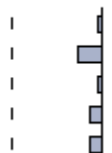 |  | 1                   | -0.047 | -0.047 | 0.0216 | 0.883  |       |
|                                                                                     |                                                                                     | 2                   | -0.206 | -0.209 | 0.5327 | 0.766  |       |
|                                                                                     |                                                                                     | 3                   | -0.026 | -0.050 | 0.5433 | 0.909  |       |
|                                                                                     |                                                                                     | 4                   | -0.114 | -0.170 | 0.8541 | 0.931  |       |
|                                                                                     |                                                                                     | 5                   | -0.107 | -0.154 | 1.3999 | 0.924  |       |

The AC and PAC of construction land carrying capacity in Heilongjiang

| Autocorrelation                                                                     | Partial Correlation                                                                 | AC | PAC    | Q-Stat | Prob   |       |
|-------------------------------------------------------------------------------------|-------------------------------------------------------------------------------------|----|--------|--------|--------|-------|
| 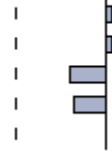 |  | 1  | 0.050  | 0.050  | 0.0244 | 0.876 |
|                                                                                     |                                                                                     | 2  | 0.061  | 0.059  | 0.0693 | 0.966 |
|                                                                                     |                                                                                     | 3  | -0.321 | -0.329 | 1.7201 | 0.632 |
|                                                                                     |                                                                                     | 4  | -0.287 | -0.286 | 3.6975 | 0.448 |
|                                                                                     |                                                                                     | 5  | -0.003 | 0.065  | 3.6980 | 0.594 |

The AC and PAC of ARIAM(1,1,2)

The ecological land carrying capacity in Heilongjiang:

First-order difference unit root test results of ecological land carrying capacity in Heilongjiang

|                                        | t-Statistic | Prob.*  |
|----------------------------------------|-------------|---------|
| Augmented Dickey-Fuller test statistic | 0.7986      | 0.8485  |
| Test critical values:                  | 1% level    | -3.1095 |
|                                        | 5% level    | -2.0439 |
|                                        | 10% level   | -1.5973 |

| Autocorrelation                                                                   |                                                                                   | Partial Correlation |        | AC     | PAC    | Q-Stat | Prob. |
|-----------------------------------------------------------------------------------|-----------------------------------------------------------------------------------|---------------------|--------|--------|--------|--------|-------|
| 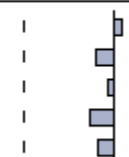 |  | 1                   | 0.075  | 0.075  | 0.0545 | 0.815  |       |
|                                                                                   |                                                                                   | 2                   | -0.158 | -0.165 | 0.3538 | 0.838  |       |
|                                                                                   |                                                                                   | 3                   | -0.053 | -0.027 | 0.3980 | 0.941  |       |
|                                                                                   |                                                                                   | 4                   | -0.221 | -0.248 | 1.5667 | 0.815  |       |
|                                                                                   |                                                                                   | 5                   | -0.144 | -0.133 | 2.5645 | 0.767  |       |

The AC and PAC of ecological land carrying capacity in Heilongjiang

| Autocorrelation                                                                   | Partial Correlation                                                               | AC | PAC    | Q-Stat | Prob   |       |
|-----------------------------------------------------------------------------------|-----------------------------------------------------------------------------------|----|--------|--------|--------|-------|
| 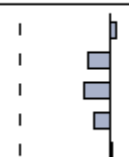 |  | 1  | 0.063  | 0.063  | 0.0382 | 0.845 |
|                                                                                   |                                                                                   | 2  | -0.202 | -0.207 | 0.5298 | 0.767 |
|                                                                                   |                                                                                   | 3  | -0.236 | -0.218 | 1.4209 | 0.701 |
|                                                                                   |                                                                                   | 4  | -0.140 | -0.173 | 1.8887 | 0.756 |
|                                                                                   |                                                                                   | 5  | 0.015  | -0.080 | 1.8994 | 0.863 |

The AC and PAC of ARIAM(1,1,1)

The cultivated land carrying capacity in Hubei:

First-order difference unit root test results of cultivated land carrying capacity in Hubei

|                                        | t-Statistic | Prob.*  |
|----------------------------------------|-------------|---------|
| Augmented Dickey-Fuller test statistic | -10.1124    | 0.0001  |
| Test critical values:                  | 1% level    | -3.1095 |
|                                        | 5% level    | -2.0439 |
|                                        | 10% level   | -1.5973 |

| Autocorrelation |                                                                                     |  | Partial Correlation |                                                                                     |  | AC | PAC    | Q-Stat | Prob.  |       |
|-----------------|-------------------------------------------------------------------------------------|--|---------------------|-------------------------------------------------------------------------------------|--|----|--------|--------|--------|-------|
|                 |  |  |                     |  |  | 1  | -0.367 | -0.367 | 1.2913 | 0.256 |
|                 |                                                                                     |  |                     |                                                                                     |  | 2  | 0.002  | -0.153 | 1.2914 | 0.524 |
|                 |                                                                                     |  |                     |                                                                                     |  | 3  | 0.085  | 0.036  | 1.4074 | 0.704 |
|                 |                                                                                     |  |                     |                                                                                     |  | 4  | -0.037 | 0.014  | 1.4399 | 0.837 |
|                 |                                                                                     |  |                     |                                                                                     |  | 5  | -0.184 | -0.216 | 3.0625 | 0.690 |

The AC and PAC of cultivated land carrying capacity in Hubei

| Autocorrelation                                                                     | Partial Correlation                                                                 | AC | PAC    | Q-Stat | Prob.  |       |
|-------------------------------------------------------------------------------------|-------------------------------------------------------------------------------------|----|--------|--------|--------|-------|
| 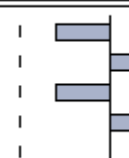 |  | 1  | -0.500 | -0.500 | 2.3979 | 0.121 |
|                                                                                     |                                                                                     | 2  | 0.252  | 0.003  | 3.1598 | 0.206 |
|                                                                                     |                                                                                     | 3  | -0.497 | -0.493 | 7.1094 | 0.068 |
|                                                                                     |                                                                                     | 4  | 0.246  | -0.328 | 8.5575 | 0.073 |
|                                                                                     |                                                                                     | 5  | -0.001 | 0.004  | 8.5576 | 0.128 |

The AC and PAC of ARIAM(1,1,2)

The construction land carrying capacity in Hubei:

First-order difference unit root test results of construction land carrying capacity in Hubei

|                                        | t-Statistic | Prob.*  |
|----------------------------------------|-------------|---------|
| Augmented Dickey-Fuller test statistic | -7.0638     | 0.0004  |
| Test critical values:                  | 1% level    | -3.2714 |
|                                        | 5% level    | -2.0823 |
|                                        | 10% level   | -1.5998 |

| Autocorrelation                                                                   | Partial Correlation                                                               | AC       | PAC    | Q-Stat | Prob  |
|-----------------------------------------------------------------------------------|-----------------------------------------------------------------------------------|----------|--------|--------|-------|
| 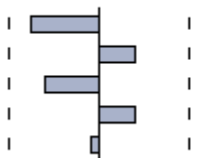 |  | 1 -0.610 | -0.610 | 3.5778 | 0.059 |
|                                                                                   |                                                                                   | 2 0.325  | -0.075 | 4.8491 | 0.089 |
|                                                                                   |                                                                                   | 3 -0.478 | -0.497 | 8.4994 | 0.037 |
|                                                                                   |                                                                                   | 4 0.335  | -0.361 | 11.187 | 0.025 |
|                                                                                   |                                                                                   | 5 -0.072 | -0.043 | 11.437 | 0.043 |

The AC and PAC of construction land carrying capacity in Hubei

| Autocorrelation                                                                   | Partial Correlation                                                               | AC       | PAC    | Q-Stat | Prob  |
|-----------------------------------------------------------------------------------|-----------------------------------------------------------------------------------|----------|--------|--------|-------|
| 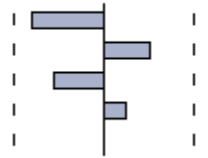 |  | 1 -0.650 | -0.650 | 4.0498 | 0.044 |
|                                                                                   |                                                                                   | 2 0.402  | -0.034 | 5.9929 | 0.050 |
|                                                                                   |                                                                                   | 3 -0.445 | -0.340 | 9.1542 | 0.027 |
|                                                                                   |                                                                                   | 4 0.196  | -0.437 | 10.074 | 0.039 |
|                                                                                   |                                                                                   | 5 -0.004 | -0.086 | 10.075 | 0.073 |

The AC and PAC of ARIAM(1,1,2)

The ecological land carrying capacity in Hubei:

First-order difference unit root test results of ecological land carrying capacity in Hubei

|                                        | t-Statistic | Prob.*  |
|----------------------------------------|-------------|---------|
| Augmented Dickey-Fuller test statistic | -5.8620     | 0.0005  |
| Test critical values:                  | 1% level    | -3.1095 |
|                                        | 5% level    | -2.0439 |
|                                        | 10% level   | -1.5973 |

| Autocorrelation                                                                     | Partial Correlation                                                                 | AC       | PAC    | Q-Stat | Prob  |
|-------------------------------------------------------------------------------------|-------------------------------------------------------------------------------------|----------|--------|--------|-------|
| 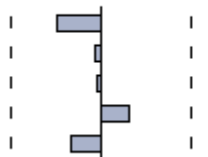 |  | 1 -0.388 | -0.388 | 1.4482 | 0.229 |
|                                                                                     |                                                                                     | 2 -0.057 | -0.245 | 1.4870 | 0.475 |
|                                                                                     |                                                                                     | 3 -0.038 | -0.202 | 1.5107 | 0.680 |
|                                                                                     |                                                                                     | 4 0.258  | 0.183  | 3.1102 | 0.540 |
|                                                                                     |                                                                                     | 5 -0.274 | -0.124 | 6.7245 | 0.242 |

The AC and PAC of ecological land carrying capacity in Hubei

| Autocorrelation                                                                     | Partial Correlation                                                                 | AC       | PAC    | Q-Stat | Prob  |
|-------------------------------------------------------------------------------------|-------------------------------------------------------------------------------------|----------|--------|--------|-------|
|  |  | 1 -0.510 | -0.510 | 2.4997 | 0.114 |
|                                                                                     |                                                                                     | 2 -0.233 | -0.667 | 3.1523 | 0.207 |
|                                                                                     |                                                                                     | 3 0.364  | -0.425 | 5.2780 | 0.153 |
|                                                                                     |                                                                                     | 4 -0.121 | -0.488 | 5.6265 | 0.229 |
|                                                                                     |                                                                                     | 5 -0.001 | -0.318 | 5.6265 | 0.344 |

The AC and PAC of ARIAM(1,1,1)

The cultivated land carrying capacity in Hunan:

First-order difference unit root test results of cultivated land carrying capacity in Hunan

|                                        | t-Statistic | Prob.*  |
|----------------------------------------|-------------|---------|
| Augmented Dickey-Fuller test statistic | -2.8726     | 0.0163  |
| Test critical values:                  | 1% level    | -3.2714 |
|                                        | 5% level    | -2.0823 |
|                                        | 10% level   | -1.5998 |

| Autocorrelation                                                                   | Partial Correlation                                                               | AC | PAC    | Q-Stat | Prob   |       |
|-----------------------------------------------------------------------------------|-----------------------------------------------------------------------------------|----|--------|--------|--------|-------|
| 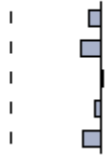 |  | 1  | -0.113 | -0.113 | 0.1219 | 0.727 |
|                                                                                   |                                                                                   | 2  | -0.187 | -0.203 | 0.5437 | 0.762 |
|                                                                                   |                                                                                   | 3  | 0.019  | -0.031 | 0.5495 | 0.908 |
|                                                                                   |                                                                                   | 4  | -0.059 | -0.104 | 0.6335 | 0.959 |
|                                                                                   |                                                                                   | 5  | -0.160 | -0.197 | 1.8575 | 0.868 |

The AC and PAC of cultivated land carrying capacity in Hunan

| Autocorrelation                                                                   | Partial Correlation                                                               | AC | PAC    | Q-Stat | Prob   |       |
|-----------------------------------------------------------------------------------|-----------------------------------------------------------------------------------|----|--------|--------|--------|-------|
|  |  | 1  | -0.147 | -0.147 | 0.2063 | 0.650 |
|  |  | 2  | -0.317 | -0.346 | 1.4106 | 0.494 |
|  |  | 3  | -0.021 | -0.156 | 1.4175 | 0.701 |
|  |  | 4  | -0.016 | -0.194 | 1.4234 | 0.840 |
|  |  | 5  | -0.000 | -0.132 | 1.4234 | 0.922 |

The AC and PAC of ARIAM(2,1,1)

The construction land carrying capacity in Hunan:

Second-order difference unit root test results of construction land carrying capacity in Hunan

|                                        | t-Statistic | Prob.*  |
|----------------------------------------|-------------|---------|
| Augmented Dickey-Fuller test statistic | -5.2792     | 0.0027  |
| Test critical values:                  | 1% level    | -3.5639 |
|                                        | 5% level    | -2.1574 |
|                                        | 10% level   | -1.6104 |

| Autocorrelation                                                                     | Partial Correlation                                                                 | AC | PAC    | Q-Stat | Prob   |       |
|-------------------------------------------------------------------------------------|-------------------------------------------------------------------------------------|----|--------|--------|--------|-------|
| 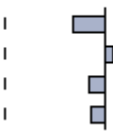 |  | 1  | -0.288 | -0.288 | 0.7272 | 0.394 |
|                                                                                     |                                                                                     | 2  | 0.079  | -0.004 | 0.8003 | 0.670 |
|                                                                                     |                                                                                     | 3  | -0.154 | -0.144 | 1.2136 | 0.750 |
|                                                                                     |                                                                                     | 4  | -0.137 | -0.245 | 1.8721 | 0.759 |

The AC and PAC of construction land carrying capacity in Hunan

| Autocorrelation                                                                     | Partial Correlation                                                                 | AC | PAC    | Q-Stat | Prob   |       |
|-------------------------------------------------------------------------------------|-------------------------------------------------------------------------------------|----|--------|--------|--------|-------|
|  |  | 1  | 0.078  | 0.078  | 0.0533 | 0.817 |
|                                                                                     |                                                                                     | 2  | -0.301 | -0.309 | 1.1099 | 0.574 |
|                                                                                     |                                                                                     | 3  | -0.279 | -0.249 | 2.4706 | 0.481 |
|                                                                                     |                                                                                     | 4  | 0.002  | -0.068 | 2.4707 | 0.650 |

The AC and PAC of ARIAM(1,2,2)

The ecological land carrying capacity in Hunan:

First-order difference unit root test results of ecological land carrying capacity in Hunan

|                                        | t-Statistic | Prob.*  |
|----------------------------------------|-------------|---------|
| Augmented Dickey-Fuller test statistic | -1.7089     | 0.0876  |
| Test critical values:                  | 1% level    | -3.5639 |
|                                        | 5% level    | -2.1574 |
|                                        | 10% level   | -1.6104 |

| Autocorrelation                                                                   | Partial Correlation                                                               | AC       | PAC    | Q-Stat | Prob  |
|-----------------------------------------------------------------------------------|-----------------------------------------------------------------------------------|----------|--------|--------|-------|
| 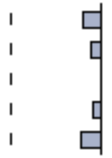 |  | 1 -0.168 | -0.168 | 0.2702 | 0.603 |
|                                                                                   |                                                                                   | 2 -0.084 | -0.115 | 0.3540 | 0.838 |
|                                                                                   |                                                                                   | 3 0.005  | -0.032 | 0.3543 | 0.950 |
|                                                                                   |                                                                                   | 4 -0.067 | -0.085 | 0.4613 | 0.977 |
|                                                                                   |                                                                                   | 5 -0.187 | -0.228 | 2.1313 | 0.831 |

The AC and PAC of ecological land carrying capacity in Hunan

| Autocorrelation                                                                   | Partial Correlation                                                               | AC       | PAC    | Q-Stat | Prob  |
|-----------------------------------------------------------------------------------|-----------------------------------------------------------------------------------|----------|--------|--------|-------|
| 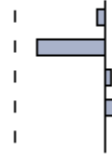 |  | 1 -0.069 | -0.069 | 0.0451 | 0.832 |
|                                                                                   |                                                                                   | 2 -0.607 | -0.615 | 4.4669 | 0.107 |
|                                                                                   |                                                                                   | 3 0.047  | -0.101 | 4.5022 | 0.212 |
|                                                                                   |                                                                                   | 4 0.128  | -0.410 | 4.8924 | 0.299 |
|                                                                                   |                                                                                   | 5 0.001  | -0.122 | 4.8925 | 0.429 |

The AC and PAC of ARIAM(1,1,2)

The cultivated land carrying capacity in Jilin:

First-order difference unit root test results of cultivated land carrying capacity in Jilin

|                                        | t-Statistic       | Prob.* |
|----------------------------------------|-------------------|--------|
| Augmented Dickey-Fuller test statistic | -2.0478           | 0.0578 |
| Test critical values:                  | 1% level -3.5639  |        |
|                                        | 5% level -2.1574  |        |
|                                        | 10% level -1.6104 |        |

| Autocorrelation                                                                     | Partial Correlation                                                                 | AC       | PAC    | Q-Stat | Prob  |
|-------------------------------------------------------------------------------------|-------------------------------------------------------------------------------------|----------|--------|--------|-------|
|  |  | 1 -0.058 | -0.058 | 0.0327 | 0.857 |
|                                                                                     |                                                                                     | 2 -0.335 | -0.339 | 1.3771 | 0.502 |
|                                                                                     |                                                                                     | 3 0.291  | 0.278  | 2.7309 | 0.435 |
|                                                                                     |                                                                                     | 4 -0.013 | -0.133 | 2.7350 | 0.603 |
|                                                                                     |                                                                                     | 5 -0.385 | -0.242 | 9.8426 | 0.080 |

The AC and PAC of cultivated land carrying capacity in Jilin

| Autocorrelation                                                                     | Partial Correlation                                                                 | AC       | PAC    | Q-Stat | Prob  |
|-------------------------------------------------------------------------------------|-------------------------------------------------------------------------------------|----------|--------|--------|-------|
| 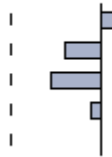 |  | 1 0.362  | 0.362  | 1.2567 | 0.262 |
|                                                                                     |                                                                                     | 2 -0.327 | -0.527 | 2.5391 | 0.281 |
|                                                                                     |                                                                                     | 3 -0.446 | -0.119 | 5.7239 | 0.126 |
|                                                                                     |                                                                                     | 4 -0.085 | 0.042  | 5.8974 | 0.207 |
|                                                                                     |                                                                                     | 5 -0.004 | -0.355 | 5.8980 | 0.316 |

The AC and PAC of ARIAM(1,1,1)

The construction land carrying capacity in Jilin:

First-order difference unit root test results of construction land carrying capacity in Jilin

|                                        | t-Statistic       | Prob.* |
|----------------------------------------|-------------------|--------|
| Augmented Dickey-Fuller test statistic | -4.5887           | 0.0017 |
| Test critical values:                  | 1% level -3.1095  |        |
|                                        | 5% level -2.0439  |        |
|                                        | 10% level -1.5973 |        |

| Autocorrelation                                                                   | Partial Correlation                                                               | AC | PAC    | Q-Stat | Prob   |       |
|-----------------------------------------------------------------------------------|-----------------------------------------------------------------------------------|----|--------|--------|--------|-------|
|  |  | 1  | -0.343 | -0.343 | 1.1279 | 0.288 |
|                                                                                   |                                                                                   | 2  | -0.031 | -0.168 | 1.1396 | 0.566 |
|                                                                                   |                                                                                   | 3  | -0.266 | -0.393 | 2.2754 | 0.517 |
|                                                                                   |                                                                                   | 4  | 0.139  | -0.179 | 2.7386 | 0.602 |
|                                                                                   |                                                                                   | 5  | 0.001  | -0.146 | 2.7387 | 0.740 |

The AC and PAC of construction land carrying capacity in Jilin

| Autocorrelation                                                                   | Partial Correlation                                                               | AC | PAC    | Q-Stat | Prob   |       |
|-----------------------------------------------------------------------------------|-----------------------------------------------------------------------------------|----|--------|--------|--------|-------|
| 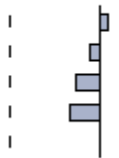 |  | 1  | 0.068  | 0.068  | 0.0444 | 0.833 |
|                                                                                   |                                                                                   | 2  | -0.087 | -0.092 | 0.1357 | 0.934 |
|                                                                                   |                                                                                   | 3  | -0.210 | -0.200 | 0.8409 | 0.840 |
|                                                                                   |                                                                                   | 4  | -0.270 | -0.266 | 2.5965 | 0.627 |
|                                                                                   |                                                                                   | 5  | -0.000 | -0.021 | 2.5966 | 0.762 |

The AC and PAC of ARIAM(2,1,1)

The ecological land carrying capacity in Jilin:

First-order difference unit root test results of ecological land carrying capacity in Jilin

|                                        | t-Statistic | Prob.*  |
|----------------------------------------|-------------|---------|
| Augmented Dickey-Fuller test statistic | -2.6657     | 0.0217  |
| Test critical values:                  | 1% level    | -3.2714 |
|                                        | 5% level    | -2.0823 |
|                                        | 10% level   | -1.5998 |

| Autocorrelation                                                                     | Partial Correlation                                                                 | AC | PAC    | Q-Stat | Prob   |       |
|-------------------------------------------------------------------------------------|-------------------------------------------------------------------------------------|----|--------|--------|--------|-------|
| 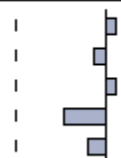 |  | 1  | 0.085  | 0.085  | 0.0692 | 0.792 |
|                                                                                     |                                                                                     | 2  | -0.111 | -0.120 | 0.2182 | 0.897 |
|                                                                                     |                                                                                     | 3  | 0.083  | 0.106  | 0.3297 | 0.954 |
|                                                                                     |                                                                                     | 4  | -0.385 | -0.432 | 3.8898 | 0.421 |
|                                                                                     |                                                                                     | 5  | -0.172 | -0.055 | 5.3064 | 0.380 |

The AC and PAC of ecological land carrying capacity in Jilin

| Autocorrelation                                                                     | Partial Correlation                                                                 | AC | PAC    | Q-Stat | Prob   |       |
|-------------------------------------------------------------------------------------|-------------------------------------------------------------------------------------|----|--------|--------|--------|-------|
| 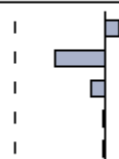 |  | 1  | 0.127  | 0.127  | 0.1545 | 0.694 |
|                                                                                     |                                                                                     | 2  | -0.450 | -0.474 | 2.5856 | 0.274 |
|                                                                                     |                                                                                     | 3  | -0.138 | 0.008  | 2.8904 | 0.409 |
|                                                                                     |                                                                                     | 4  | -0.024 | -0.279 | 2.9041 | 0.574 |
|                                                                                     |                                                                                     | 5  | -0.015 | -0.044 | 2.9147 | 0.713 |

The AC and PAC of ARIAM(1,1,2)

The cultivated land carrying capacity in Jiangsu:

First-order difference unit root test results of cultivated land carrying capacity in Jiangsu

|                                        | t-Statistic | Prob.*  |
|----------------------------------------|-------------|---------|
| Augmented Dickey-Fuller test statistic | -2.6944     | 0.0182  |
| Test critical values:                  | 1% level    | -3.1095 |
|                                        | 5% level    | -2.0439 |
|                                        | 10% level   | -1.5973 |

| Autocorrelation                                                                   | Partial Correlation                                                               | AC | PAC    | Q-Stat | Prob   |       |
|-----------------------------------------------------------------------------------|-----------------------------------------------------------------------------------|----|--------|--------|--------|-------|
|  |  | 1  | 0.235  | 0.235  | 0.5287 | 0.467 |
|                                                                                   |                                                                                   | 2  | -0.115 | -0.180 | 0.6863 | 0.710 |
|                                                                                   |                                                                                   | 3  | -0.011 | 0.069  | 0.6882 | 0.876 |
|                                                                                   |                                                                                   | 4  | -0.211 | -0.272 | 1.7588 | 0.780 |
|                                                                                   |                                                                                   | 5  | -0.398 | -0.303 | 9.3683 | 0.095 |

The AC and PAC of cultivated land carrying capacity in Jiangsu

| Autocorrelation                                                                   | Partial Correlation                                                               | AC | PAC    | Q-Stat | Prob   |       |
|-----------------------------------------------------------------------------------|-----------------------------------------------------------------------------------|----|--------|--------|--------|-------|
| 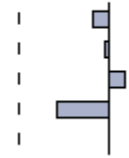 |  | 1  | -0.155 | -0.155 | 0.2300 | 0.632 |
|                                                                                   |                                                                                   | 2  | -0.025 | -0.050 | 0.2375 | 0.888 |
|                                                                                   |                                                                                   | 3  | 0.146  | 0.137  | 0.5771 | 0.902 |
|                                                                                   |                                                                                   | 4  | -0.473 | -0.450 | 5.9544 | 0.203 |
|                                                                                   |                                                                                   | 5  | 0.007  | -0.130 | 5.9571 | 0.310 |

The AC and PAC of ARIAM(1,1,2)

The construction land carrying capacity in Jiangsu:

First-order difference unit root test results of construction land carrying capacity in Jiangsu

|                                        | t-Statistic | Prob.*  |
|----------------------------------------|-------------|---------|
| Augmented Dickey-Fuller test statistic | -3.8264     | 0.0054  |
| Test critical values:                  | 1% level    | -3.2714 |
|                                        | 5% level    | -2.0823 |
|                                        | 10% level   | -1.5998 |

| Autocorrelation                                                                     | Partial Correlation                                                                 | AC | PAC    | Q-Stat | Prob   |       |
|-------------------------------------------------------------------------------------|-------------------------------------------------------------------------------------|----|--------|--------|--------|-------|
|  |  | 1  | -0.310 | -0.310 | 0.9200 | 0.337 |
|                                                                                     |                                                                                     | 2  | -0.073 | -0.187 | 0.9848 | 0.611 |
|                                                                                     |                                                                                     | 3  | 0.044  | -0.047 | 1.0155 | 0.797 |
|                                                                                     |                                                                                     | 4  | -0.424 | -0.502 | 5.3213 | 0.256 |
|                                                                                     |                                                                                     | 5  | 0.263  | -0.101 | 8.6359 | 0.125 |

The AC and PAC of construction land carrying capacity in Jiangsu

| Autocorrelation                                                                     | Partial Correlation                                                                 | AC | PAC    | Q-Stat | Prob   |       |
|-------------------------------------------------------------------------------------|-------------------------------------------------------------------------------------|----|--------|--------|--------|-------|
| 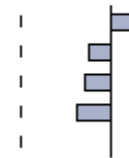 |  | 1  | 0.227  | 0.227  | 0.4956 | 0.481 |
|                                                                                     |                                                                                     | 2  | -0.202 | -0.267 | 0.9835 | 0.612 |
|                                                                                     |                                                                                     | 3  | -0.230 | -0.126 | 1.8272 | 0.609 |
|                                                                                     |                                                                                     | 4  | -0.297 | -0.296 | 3.9492 | 0.413 |
|                                                                                     |                                                                                     | 5  | 0.001  | 0.069  | 3.9493 | 0.557 |

The AC and PAC of ARIAM(1,1,2)

The ecological land carrying capacity in Jiangsu:

Second-order difference unit root test results of ecological land carrying capacity in Jiangsu

|                                        | t-Statistic | Prob.*  |
|----------------------------------------|-------------|---------|
| Augmented Dickey-Fuller test statistic | -2.1223     | 0.0473  |
| Test critical values:                  | 1% level    | -3.2714 |
|                                        | 5% level    | -2.0823 |
|                                        | 10% level   | -1.5998 |

| Autocorrelation                                                                   | Partial Correlation                                                               | AC | PAC    | Q-Stat | Prob.  |       |
|-----------------------------------------------------------------------------------|-----------------------------------------------------------------------------------|----|--------|--------|--------|-------|
| 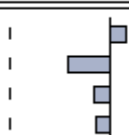 |  | 1  | 0.142  | 0.142  | 0.1754 | 0.675 |
|                                                                                   |                                                                                   | 2  | -0.370 | -0.398 | 1.7711 | 0.412 |
|                                                                                   |                                                                                   | 3  | -0.153 | -0.028 | 2.1800 | 0.536 |
|                                                                                   |                                                                                   | 4  | -0.119 | -0.281 | 2.6748 | 0.614 |

The AC and PAC of ecological land carrying capacity in Jiangsu

| Autocorrelation                                                                   | Partial Correlation                                                               | AC | PAC    | Q-Stat | Prob   |       |
|-----------------------------------------------------------------------------------|-----------------------------------------------------------------------------------|----|--------|--------|--------|-------|
| 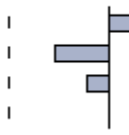 |  | 1  | 0.196  | 0.196  | 0.3351 | 0.563 |
|                                                                                   |                                                                                   | 2  | -0.494 | -0.554 | 3.1859 | 0.203 |
|                                                                                   |                                                                                   | 3  | -0.203 | 0.084  | 3.9047 | 0.272 |
|                                                                                   |                                                                                   | 4  | 0.001  | -0.348 | 3.9048 | 0.419 |

The AC and PAC of ARIAM(1,2,2)

The cultivated land carrying capacity in Jiangxi:

First-order difference unit root test results of cultivated land carrying capacity in Jiangxi

|                                        | t-Statistic | Prob.*  |
|----------------------------------------|-------------|---------|
| Augmented Dickey-Fuller test statistic | -1.8190     | 0.0695  |
| Test critical values:                  | 1% level    | -3.0074 |
|                                        | 5% level    | -2.0211 |
|                                        | 10% level   | -1.5972 |

| Autocorrelation                                                                     | Partial Correlation                                                                 | AC | PAC    | Q-Stat | Prob   |       |
|-------------------------------------------------------------------------------------|-------------------------------------------------------------------------------------|----|--------|--------|--------|-------|
| 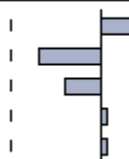 |  | 1  | 0.266  | 0.266  | 0.6775 | 0.410 |
|                                                                                     |                                                                                     | 2  | -0.550 | -0.667 | 4.3019 | 0.116 |
|                                                                                     |                                                                                     | 3  | -0.333 | 0.169  | 6.0815 | 0.108 |
|                                                                                     |                                                                                     | 4  | 0.058  | -0.419 | 6.1611 | 0.187 |
|                                                                                     |                                                                                     | 5  | 0.060  | 0.011  | 6.3327 | 0.275 |

The AC and PAC of cultivated land carrying capacity in Jiangxi

| Autocorrelation                                                                     | Partial Correlation                                                                 | AC | PAC    | Q-Stat | Prob   |       |
|-------------------------------------------------------------------------------------|-------------------------------------------------------------------------------------|----|--------|--------|--------|-------|
| 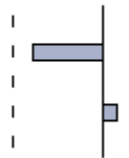 |  | 1  | -0.005 | -0.005 | 0.0002 | 0.988 |
|                                                                                     |                                                                                     | 2  | -0.628 | -0.628 | 4.7328 | 0.094 |
|                                                                                     |                                                                                     | 3  | 0.004  | -0.007 | 4.7330 | 0.192 |
|                                                                                     |                                                                                     | 4  | 0.130  | -0.437 | 5.1375 | 0.273 |
|                                                                                     |                                                                                     | 5  | -0.001 | -0.010 | 5.1375 | 0.399 |

The AC and PAC of ARIAM(1,1,1)

The construction land carrying capacity in Jiangxi:

First-order difference unit root test results of construction land carrying capacity in Jiangxi

|                                        | t-Statistic | Prob.*  |
|----------------------------------------|-------------|---------|
| Augmented Dickey-Fuller test statistic | -5.5307     | 0.0004  |
| Test critical values:                  | 1% level    | -3.0074 |
|                                        | 5% level    | -2.0211 |
|                                        | 10% level   | -1.5972 |



| Autocorrelation                                                                   | Partial Correlation                                                               | AC       | PAC    | Q-Stat | Prob  |
|-----------------------------------------------------------------------------------|-----------------------------------------------------------------------------------|----------|--------|--------|-------|
|  |  | 1 -0.344 | -0.344 | 1.1373 | 0.286 |
|                                                                                   |                                                                                   | 2 -0.043 | -0.183 | 1.1594 | 0.560 |
|                                                                                   |                                                                                   | 3 0.200  | 0.140  | 1.7989 | 0.615 |
|                                                                                   |                                                                                   | 4 -0.209 | -0.108 | 2.8502 | 0.583 |
|                                                                                   |                                                                                   | 5 -0.103 | -0.224 | 3.3638 | 0.644 |

The AC and PAC of construction land carrying capacity in Jiangxi

| Autocorrelation                                                                   | Partial Correlation                                                               | AC       | PAC    | Q-Stat | Prob  |
|-----------------------------------------------------------------------------------|-----------------------------------------------------------------------------------|----------|--------|--------|-------|
|  |  | 1 -0.288 | -0.288 | 0.7936 | 0.373 |
|                                                                                   |                                                                                   | 2 -0.279 | -0.394 | 1.7254 | 0.422 |
|                                                                                   |                                                                                   | 3 0.260  | 0.045  | 2.8047 | 0.423 |
|                                                                                   |                                                                                   | 4 -0.204 | -0.254 | 3.8042 | 0.433 |
|                                                                                   |                                                                                   | 5 0.011  | -0.042 | 3.8095 | 0.577 |

The AC and PAC of ARIAM(1,1,2)

The ecological land carrying capacity in Jiangxi:

First-order difference unit root test results of ecological land carrying capacity in Jiangxi

|                                        | t-Statistic | Prob.*  |
|----------------------------------------|-------------|---------|
| Augmented Dickey-Fuller test statistic | -21.1795    | 0.0001  |
| Test critical values:                  | 1% level    | -3.2714 |
|                                        | 5% level    | -2.0823 |
|                                        | 10% level   | -1.5998 |

| Autocorrelation                                                                     | Partial Correlation                                                                 | AC       | PAC    | Q-Stat | Prob  |
|-------------------------------------------------------------------------------------|-------------------------------------------------------------------------------------|----------|--------|--------|-------|
| 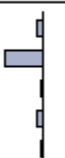 |  | 1 -0.057 | -0.057 | 0.0310 | 0.860 |
|                                                                                     |                                                                                     | 2 -0.337 | -0.342 | 1.3968 | 0.497 |
|                                                                                     |                                                                                     | 3 -0.019 | -0.073 | 1.4028 | 0.705 |
|                                                                                     |                                                                                     | 4 -0.065 | -0.215 | 1.5050 | 0.826 |
|                                                                                     |                                                                                     | 5 -0.021 | -0.097 | 1.5263 | 0.910 |

The AC and PAC of ecological land carrying capacity in Jiangxi

| Autocorrelation                                                                     | Partial Correlation                                                                 | AC       | PAC    | Q-Stat | Prob  |
|-------------------------------------------------------------------------------------|-------------------------------------------------------------------------------------|----------|--------|--------|-------|
|  |  | 1 -0.065 | -0.065 | 0.0408 | 0.840 |
|                                                                                     |                                                                                     | 2 -0.100 | -0.105 | 0.1608 | 0.923 |
|                                                                                     |                                                                                     | 3 -0.159 | -0.176 | 0.5651 | 0.904 |
|                                                                                     |                                                                                     | 4 -0.176 | -0.224 | 1.3086 | 0.860 |
|                                                                                     |                                                                                     | 5 0.000  | -0.088 | 1.3086 | 0.934 |

The AC and PAC of ARIAM(1,1,1)

The cultivated land carrying capacity in Liaoning:

Second-order difference unit root test results of cultivated land carrying capacity in Liaoning

|                                        | t-Statistic | Prob.*  |
|----------------------------------------|-------------|---------|
| Augmented Dickey-Fuller test statistic | -3.2079     | 0.0086  |
| Test critical values:                  | 1% level    | -3.1095 |
|                                        | 5% level    | -2.0439 |
|                                        | 10% level   | -1.5973 |

| Autocorrelation                                                                   | Partial Correlation                                                               | AC       | PAC    | Q-Stat | Prob  |
|-----------------------------------------------------------------------------------|-----------------------------------------------------------------------------------|----------|--------|--------|-------|
| 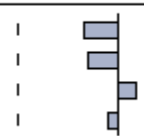 |  | 1 -0.308 | -0.308 | 0.8284 | 0.363 |
|                                                                                   |                                                                                   | 2 -0.268 | -0.401 | 1.6673 | 0.434 |
|                                                                                   |                                                                                   | 3 0.171  | -0.089 | 2.1817 | 0.536 |
|                                                                                   |                                                                                   | 4 -0.096 | -0.213 | 2.5015 | 0.644 |

The AC and PAC of cultivated land carrying capacity in Liaoning

| Autocorrelation                                                                   | Partial Correlation                                                               | AC       | PAC    | Q-Stat | Prob  |
|-----------------------------------------------------------------------------------|-----------------------------------------------------------------------------------|----------|--------|--------|-------|
| 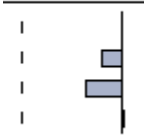 |  | 1 -0.002 | -0.002 | 2.E-05 | 0.996 |
|                                                                                   |                                                                                   | 2 -0.178 | -0.178 | 0.3701 | 0.831 |
|                                                                                   |                                                                                   | 3 -0.329 | -0.341 | 2.2695 | 0.518 |
|                                                                                   |                                                                                   | 4 0.009  | -0.051 | 2.2724 | 0.686 |

The AC and PAC of ARIAM(1,2,1)

The construction land carrying capacity in Liaoning:

First-order difference unit root test results of construction land carrying capacity in Liaoning

|                                        | t-Statistic | Prob.*  |
|----------------------------------------|-------------|---------|
| Augmented Dickey-Fuller test statistic | -2.6555     | 0.0174  |
| Test critical values:                  | 1% level    | -3.0074 |
|                                        | 5% level    | -2.0211 |
|                                        | 10% level   | -1.5972 |

| Autocorrelation                                                                     | Partial Correlation                                                                 | AC       | PAC    | Q-Stat | Prob  |
|-------------------------------------------------------------------------------------|-------------------------------------------------------------------------------------|----------|--------|--------|-------|
|  |  | 1 0.130  | 0.130  | 0.1621 | 0.687 |
|                                                                                     |                                                                                     | 2 -0.449 | -0.474 | 2.5782 | 0.276 |
|                                                                                     |                                                                                     | 3 -0.334 | -0.245 | 4.3671 | 0.224 |
|                                                                                     |                                                                                     | 4 0.155  | 0.029  | 4.9445 | 0.293 |
|                                                                                     |                                                                                     | 5 -0.002 | -0.374 | 4.9447 | 0.423 |

The AC and PAC of construction land carrying capacity in Liaoning

| Autocorrelation                                                                     | Partial Correlation                                                                 | AC       | PAC    | Q-Stat | Prob  |
|-------------------------------------------------------------------------------------|-------------------------------------------------------------------------------------|----------|--------|--------|-------|
| 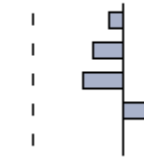 |  | 1 -0.135 | -0.135 | 0.1744 | 0.676 |
|                                                                                     |                                                                                     | 2 -0.266 | -0.289 | 1.0204 | 0.600 |
|                                                                                     |                                                                                     | 3 -0.355 | -0.489 | 3.0382 | 0.386 |
|                                                                                     |                                                                                     | 4 0.252  | -0.037 | 4.5600 | 0.335 |
|                                                                                     |                                                                                     | 5 0.004  | -0.275 | 4.5607 | 0.472 |

The AC and PAC of ARIAM(1,1,2)

The ecological land carrying capacity in Liaoning:

First-order difference unit root test results of ecological land carrying capacity in Liaoning

|                                        | t-Statistic | Prob.*  |
|----------------------------------------|-------------|---------|
| Augmented Dickey-Fuller test statistic | -4.3534     | 0.0022  |
| Test critical values:                  | 1% level    | -3.1095 |
|                                        | 5% level    | -2.0439 |
|                                        | 10% level   | -1.5973 |

| Autocorrelation                                                                   | Partial Correlation                                                               | AC | PAC    | Q-Stat | Prob   |       |
|-----------------------------------------------------------------------------------|-----------------------------------------------------------------------------------|----|--------|--------|--------|-------|
|  |  | 1  | 0.206  | 0.206  | 0.4074 | 0.523 |
|                                                                                   |                                                                                   | 2  | 0.062  | 0.020  | 0.4535 | 0.797 |
|                                                                                   |                                                                                   | 3  | -0.166 | -0.191 | 0.8961 | 0.826 |
|                                                                                   |                                                                                   | 4  | -0.188 | -0.128 | 1.7402 | 0.783 |
|                                                                                   |                                                                                   | 5  | -0.414 | -0.367 | 9.9725 | 0.076 |

The AC and PAC of ecological land carrying capacity in Liaoning

| Autocorrelation                                                                   | Partial Correlation                                                               | AC | PAC    | Q-Stat | Prob   |       |
|-----------------------------------------------------------------------------------|-----------------------------------------------------------------------------------|----|--------|--------|--------|-------|
|  |  | 1  | -0.194 | -0.194 | 0.3606 | 0.548 |
|                                                                                   |                                                                                   | 2  | 0.051  | 0.014  | 0.3919 | 0.822 |
|                                                                                   |                                                                                   | 3  | 0.004  | 0.017  | 0.3922 | 0.942 |
|  |  | 4  | -0.380 | -0.391 | 3.8540 | 0.426 |
|                                                                                   |                                                                                   | 5  | 0.018  | -0.153 | 3.8703 | 0.568 |

The AC and PAC of ARIAM(1,1,2)

The cultivated land carrying capacity in Inner Mongolia:

First-order difference unit root test results of cultivated land carrying capacity in Inner Mongolia

|                                        | t-Statistic | Prob.*  |
|----------------------------------------|-------------|---------|
| Augmented Dickey-Fuller test statistic | -2.0688     | 0.0513  |
| Test critical values:                  | 1% level    | -3.2714 |
|                                        | 5% level    | -2.0823 |
|                                        | 10% level   | -1.5998 |

| Autocorrelation                                                                     | Partial Correlation                                                                 | AC | PAC    | Q-Stat | Prob   |       |
|-------------------------------------------------------------------------------------|-------------------------------------------------------------------------------------|----|--------|--------|--------|-------|
| 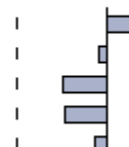 |  | 1  | 0.462  | 0.462  | 2.0528 | 0.152 |
|                                                                                     |                                                                                     | 2  | -0.072 | -0.364 | 2.1152 | 0.347 |
|                                                                                     |                                                                                     | 3  | -0.409 | -0.286 | 4.7930 | 0.188 |
|                                                                                     |                                                                                     | 4  | -0.383 | -0.077 | 8.3075 | 0.081 |
|                                                                                     |                                                                                     | 5  | -0.099 | 0.051  | 8.7734 | 0.118 |

The AC and PAC of cultivated land carrying capacity in Inner Mongolia

| Autocorrelation                                                                     | Partial Correlation                                                                 | AC | PAC    | Q-Stat | Prob.  |       |
|-------------------------------------------------------------------------------------|-------------------------------------------------------------------------------------|----|--------|--------|--------|-------|
| 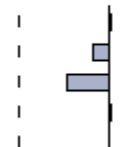 |  | 1  | 0.009  | 0.009  | 0.0007 | 0.978 |
|                                                                                     |                                                                                     | 2  | -0.151 | -0.151 | 0.2743 | 0.872 |
|                                                                                     |                                                                                     | 3  | -0.373 | -0.379 | 2.4993 | 0.475 |
|                                                                                     |                                                                                     | 4  | 0.015  | -0.025 | 2.5048 | 0.644 |
|                                                                                     |                                                                                     | 5  | -0.000 | -0.135 | 2.5048 | 0.776 |

The AC and PAC of ARIAM(1,1,1)

The construction land carrying capacity in Inner Mongolia:

First-order difference unit root test results of construction land carrying capacity in Inner Mongolia

|                                        | t-Statistic | Prob.*  |
|----------------------------------------|-------------|---------|
| Augmented Dickey-Fuller test statistic | -6.9418     | 0.0004  |
| Test critical values:                  | 1% level    | -3.2714 |
|                                        | 5% level    | -2.0823 |
|                                        | 10% level   | -1.5998 |

| Autocorrelation                                                                   | Partial Correlation                                                               | AC | PAC    | Q-Stat | Prob.  |       |
|-----------------------------------------------------------------------------------|-----------------------------------------------------------------------------------|----|--------|--------|--------|-------|
| 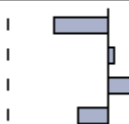 |  | 1  | -0.494 | -0.494 | 2.1355 | 0.144 |
|                                                                                   |                                                                                   | 2  | 0.044  | -0.264 | 2.1585 | 0.340 |
|                                                                                   |                                                                                   | 3  | 0.225  | 0.174  | 3.0482 | 0.384 |
|                                                                                   |                                                                                   | 4  | -0.276 | -0.077 | 5.7105 | 0.222 |

The AC and PAC of construction land carrying capacity in Inner Mongolia

| Autocorrelation                                                                   | Partial Correlation                                                               | AC | PAC    | Q-Stat | Prob   |       |
|-----------------------------------------------------------------------------------|-----------------------------------------------------------------------------------|----|--------|--------|--------|-------|
| 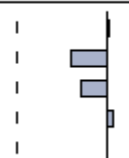 |  | 1  | 0.018  | 0.018  | 0.0030 | 0.956 |
|                                                                                   |                                                                                   | 2  | -0.326 | -0.326 | 1.2757 | 0.528 |
|                                                                                   |                                                                                   | 3  | -0.241 | -0.254 | 2.2012 | 0.532 |
|                                                                                   |                                                                                   | 4  | 0.050  | -0.077 | 2.2608 | 0.688 |
|                                                                                   |                                                                                   | 5  | -0.002 | -0.197 | 2.2609 | 0.812 |

The AC and PAC of ARIAM(1,1,3)

The ecological land carrying capacity in Inner Mongolia:

First-order difference unit root test results of ecological land carrying capacity in Inner Mongolia

|                                        | t-Statistic | Prob.*  |
|----------------------------------------|-------------|---------|
| Augmented Dickey-Fuller test statistic | -1.8545     | 0.0689  |
| Test critical values:                  | 1% level    | -3.2714 |
|                                        | 5% level    | -2.0823 |
|                                        | 10% level   | -1.5998 |

| Autocorrelation                                                                     | Partial Correlation                                                                 | AC | PAC    | Q-Stat | Prob.  |       |
|-------------------------------------------------------------------------------------|-------------------------------------------------------------------------------------|----|--------|--------|--------|-------|
| 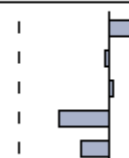 |  | 1  | 0.198  | 0.198  | 0.3776 | 0.539 |
|                                                                                     |                                                                                     | 2  | -0.031 | -0.073 | 0.3893 | 0.823 |
|                                                                                     |                                                                                     | 3  | 0.036  | 0.059  | 0.4096 | 0.938 |
|                                                                                     |                                                                                     | 4  | -0.444 | -0.489 | 5.1307 | 0.274 |
|                                                                                     |                                                                                     | 5  | -0.259 | -0.059 | 8.3536 | 0.138 |

The AC and PAC of ecological land carrying capacity in Inner Mongolia

| Autocorrelation                                                                     | Partial Correlation                                                                 | AC | PAC    | Q-Stat | Prob   |       |
|-------------------------------------------------------------------------------------|-------------------------------------------------------------------------------------|----|--------|--------|--------|-------|
| 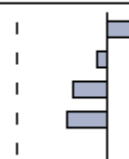 |  | 1  | 0.270  | 0.270  | 0.6994 | 0.403 |
|                                                                                     |                                                                                     | 2  | -0.093 | -0.178 | 0.8022 | 0.670 |
|                                                                                     |                                                                                     | 3  | -0.316 | -0.266 | 2.4020 | 0.493 |
|                                                                                     |                                                                                     | 4  | -0.365 | -0.260 | 5.6052 | 0.231 |
|                                                                                     |                                                                                     | 5  | 0.004  | 0.119  | 5.6061 | 0.346 |

The AC and PAC of ARIAM(1,1,1)

The cultivated land carrying capacity in Ningxia:

First-order difference unit root test results of cultivated land carrying capacity in Ningxia

|                                        | t-Statistic | Prob.*  |
|----------------------------------------|-------------|---------|
| Augmented Dickey-Fuller test statistic | -0.7133     | 0.3498  |
| Test critical values:                  | 1% level    | -3.2714 |
|                                        | 5% level    | -2.0823 |
|                                        | 10% level   | -1.5998 |

|  | Autocorrelation                                                                   | Partial Correlation                                                               |   | AC     | PAC    | Q-Stat | Prob  |
|--|-----------------------------------------------------------------------------------|-----------------------------------------------------------------------------------|---|--------|--------|--------|-------|
|  |  |  | 1 | 0.361  | 0.361  | 1.2484 | 0.264 |
|  |                                                                                   |                                                                                   | 2 | -0.248 | -0.434 | 1.9855 | 0.371 |
|  |                                                                                   |                                                                                   | 3 | -0.345 | -0.085 | 3.8870 | 0.274 |
|  |                                                                                   |                                                                                   | 4 | -0.148 | -0.069 | 4.4100 | 0.353 |
|  |                                                                                   |                                                                                   | 5 | -0.120 | -0.261 | 5.1060 | 0.403 |

The AC and PAC of cultivated land carrying capacity in Ningxia

|  | Autocorrelation                                                                   | Partial Correlation                                                               |   | AC     | PAC    | Q-Stat | Prob  |
|--|-----------------------------------------------------------------------------------|-----------------------------------------------------------------------------------|---|--------|--------|--------|-------|
|  | 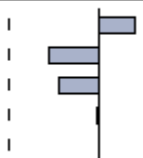 |  | 1 | 0.318  | 0.318  | 0.9738 | 0.324 |
|  |                                                                                   |                                                                                   | 2 | -0.447 | -0.610 | 3.3711 | 0.185 |
|  |                                                                                   |                                                                                   | 3 | -0.367 | 0.101  | 5.5250 | 0.137 |
|  |                                                                                   |                                                                                   | 4 | -0.011 | -0.230 | 5.5279 | 0.237 |
|  |                                                                                   |                                                                                   | 5 | 0.006  | -0.206 | 5.5298 | 0.355 |

The AC and PAC of ARIAM(2,1,1)

The construction land carrying capacity in Ningxia:

First-order difference unit root test results of construction land carrying capacity in Ningxia

|                                        |           | t-Statistic | Prob.* |
|----------------------------------------|-----------|-------------|--------|
| Augmented Dickey-Fuller test statistic |           | -1.6923     | 0.0870 |
| Test critical values:                  | 1% level  | -3.2714     |        |
|                                        | 5% level  | -2.0823     |        |
|                                        | 10% level | -1.5998     |        |

|  | Autocorrelation                                                                     | Partial Correlation                                                                 |   | AC     | PAC    | Q-Stat | Prob  |
|--|-------------------------------------------------------------------------------------|-------------------------------------------------------------------------------------|---|--------|--------|--------|-------|
|  | 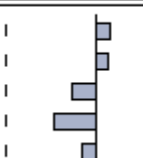 |  | 1 | 0.119  | 0.119  | 0.1354 | 0.713 |
|  |                                                                                     |                                                                                     | 2 | 0.108  | 0.095  | 0.2745 | 0.872 |
|  |                                                                                     |                                                                                     | 3 | -0.211 | -0.239 | 0.9860 | 0.805 |
|  |                                                                                     |                                                                                     | 4 | -0.377 | -0.363 | 4.3981 | 0.355 |
|  |                                                                                     |                                                                                     | 5 | -0.138 | -0.030 | 5.3186 | 0.378 |

The AC and PAC of construction land carrying capacity in Ningxia

|  | Autocorrelation                                                                     | Partial Correlation                                                                 |   | AC     | PAC    | Q-Stat | Prob  |
|--|-------------------------------------------------------------------------------------|-------------------------------------------------------------------------------------|---|--------|--------|--------|-------|
|  | 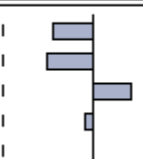 |  | 1 | -0.355 | -0.355 | 1.2086 | 0.272 |
|  |                                                                                     |                                                                                     | 2 | -0.417 | -0.621 | 3.2964 | 0.192 |
|  |                                                                                     |                                                                                     | 3 | 0.340  | -0.223 | 5.1508 | 0.161 |
|  |                                                                                     |                                                                                     | 4 | -0.070 | -0.430 | 5.2690 | 0.261 |
|  |                                                                                     |                                                                                     | 5 | 0.002  | -0.154 | 5.2691 | 0.384 |

The AC and PAC of ARIAM(1,1,2)

The ecological land carrying capacity in Ningxia:

First-order difference unit root test results of ecological land carrying capacity in Ningxia

|                                        |           | t-Statistic | Prob.* |
|----------------------------------------|-----------|-------------|--------|
| Augmented Dickey-Fuller test statistic |           | -0.3323     | 0.0821 |
| Test critical values:                  | 1% level  | -6.4236     |        |
|                                        | 5% level  | -3.9849     |        |
|                                        | 10% level | -3.1206     |        |

| Autocorrelation                                                                   | Partial Correlation                                                               | AC | PAC    | Q-Stat | Prob   |       |
|-----------------------------------------------------------------------------------|-----------------------------------------------------------------------------------|----|--------|--------|--------|-------|
| 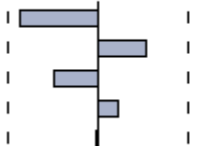 |  | 1  | -0.704 | -0.704 | 4.7622 | 0.029 |
|                                                                                   |                                                                                   | 2  | 0.428  | -0.135 | 6.9590 | 0.031 |
|                                                                                   |                                                                                   | 3  | -0.388 | -0.285 | 9.3630 | 0.025 |
|                                                                                   |                                                                                   | 4  | 0.180  | -0.417 | 10.143 | 0.038 |
|                                                                                   |                                                                                   | 5  | -0.016 | -0.175 | 10.156 | 0.071 |

The AC and PAC of ecological land carrying capacity in Ningxia

| Autocorrelation                                                                   | Partial Correlation                                                               | AC | PAC    | Q-Stat | Prob   |       |
|-----------------------------------------------------------------------------------|-----------------------------------------------------------------------------------|----|--------|--------|--------|-------|
| 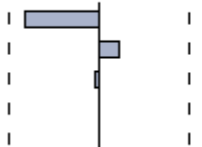 |  | 1  | -0.658 | -0.658 | 4.1528 | 0.042 |
|                                                                                   |                                                                                   | 2  | 0.183  | -0.440 | 4.5543 | 0.103 |
|                                                                                   |                                                                                   | 3  | -0.038 | -0.336 | 4.5772 | 0.206 |
|                                                                                   |                                                                                   | 4  | 0.006  | -0.291 | 4.5780 | 0.333 |
|                                                                                   |                                                                                   | 5  | 0.007  | -0.256 | 4.5803 | 0.469 |

The AC and PAC of ARIAM(1,1,1)

The cultivated land carrying capacity in Qinghai:

First-order difference unit root test results of cultivated land carrying capacity in Qinghai

|                                        | t-Statistic | Prob.*  |
|----------------------------------------|-------------|---------|
| Augmented Dickey-Fuller test statistic | -5.8850     | 0.0019  |
| Test critical values:                  | 1% level    | -3.5639 |
|                                        | 5% level    | -2.1574 |
|                                        | 10% level   | -1.6104 |

| Autocorrelation                                                                     | Partial Correlation                                                                 | AC | PAC    | Q-Stat | Prob   |       |
|-------------------------------------------------------------------------------------|-------------------------------------------------------------------------------------|----|--------|--------|--------|-------|
|  |  | 1  | -0.367 | -0.367 | 1.2942 | 0.255 |
|                                                                                     |                                                                                     | 2  | -0.172 | -0.355 | 1.6490 | 0.438 |
|                                                                                     |                                                                                     | 3  | 0.082  | -0.177 | 1.7554 | 0.625 |
|                                                                                     |                                                                                     | 4  | -0.023 | -0.162 | 1.7680 | 0.778 |
|                                                                                     |                                                                                     | 5  | -0.020 | -0.135 | 1.7863 | 0.878 |

The AC and PAC of cultivated land carrying capacity in Qinghai

| Autocorrelation                                                                     | Partial Correlation                                                                 | AC | PAC    | Q-Stat | Prob   |       |
|-------------------------------------------------------------------------------------|-------------------------------------------------------------------------------------|----|--------|--------|--------|-------|
|  |  | 1  | 0.205  | 0.205  | 0.4015 | 0.526 |
|  |  | 2  | -0.375 | -0.435 | 2.0923 | 0.351 |
|  |  | 3  | -0.297 | -0.126 | 3.5029 | 0.320 |
|  |  | 4  | -0.032 | -0.111 | 3.5268 | 0.474 |
|  |  | 5  | -0.001 | -0.185 | 3.5268 | 0.619 |

The AC and PAC of ARIAM(1,1,2)

The construction land carrying capacity in Qinghai:

First-order difference unit root test results of construction land carrying capacity in Qinghai

|                                        | t-Statistic | Prob.*  |
|----------------------------------------|-------------|---------|
| Augmented Dickey-Fuller test statistic | -2.1723     | 0.0406  |
| Test critical values:                  | 1% level    | -3.1095 |
|                                        | 5% level    | -2.0439 |
|                                        | 10% level   | -1.5973 |

| Autocorrelation                                                                   | Partial Correlation                                                               | AC       | PAC    | Q-Stat | Prob  |
|-----------------------------------------------------------------------------------|-----------------------------------------------------------------------------------|----------|--------|--------|-------|
|  |  | 1 -0.352 | -0.352 | 1.1873 | 0.276 |
|                                                                                   |                                                                                   | 2 -0.149 | -0.311 | 1.4536 | 0.483 |
|                                                                                   |                                                                                   | 3 -0.084 | -0.332 | 1.5673 | 0.667 |
|                                                                                   |                                                                                   | 4 0.073  | -0.227 | 1.6967 | 0.791 |
|                                                                                   |                                                                                   | 5 0.012  | -0.206 | 1.7031 | 0.889 |

| The AC and PAC of construction land carrying capacity in Qinghai                  |                                                                                   |          |        |        |       |
|-----------------------------------------------------------------------------------|-----------------------------------------------------------------------------------|----------|--------|--------|-------|
| Autocorrelation                                                                   | Partial Correlation                                                               | AC       | PAC    | Q-Stat | Prob  |
|  |  | 1 -0.098 | -0.098 | 0.0919 | 0.762 |
|                                                                                   |                                                                                   | 2 -0.581 | -0.596 | 4.1365 | 0.126 |
|                                                                                   |                                                                                   | 3 0.069  | -0.125 | 4.2132 | 0.239 |
|                                                                                   |                                                                                   | 4 0.111  | -0.386 | 4.5077 | 0.342 |
|                                                                                   |                                                                                   | 5 -0.002 | -0.137 | 4.5078 | 0.479 |

The AC and PAC of ARIAM(1,1,3)

The ecological land carrying capacity in Qinghai:

First-order difference unit root test results of ecological land carrying capacity in Qinghai

|                                        | t-Statistic | Prob.*  |
|----------------------------------------|-------------|---------|
| Augmented Dickey-Fuller test statistic | -2.3531     | 0.0344  |
| Test critical values:                  | 1% level    | -3.2714 |
|                                        | 5% level    | -2.0823 |
|                                        | 10% level   | -1.5998 |

| Autocorrelation                                                                     | Partial Correlation                                                                 | AC       | PAC    | Q-Stat | Prob  |
|-------------------------------------------------------------------------------------|-------------------------------------------------------------------------------------|----------|--------|--------|-------|
|  |  | 1 0.236  | 0.236  | 0.5344 | 0.465 |
|                                                                                     |                                                                                     | 2 -0.023 | -0.083 | 0.5405 | 0.763 |
|                                                                                     |                                                                                     | 3 -0.036 | -0.011 | 0.5609 | 0.905 |
|                                                                                     |                                                                                     | 4 -0.475 | -0.496 | 5.9844 | 0.200 |
|                                                                                     |                                                                                     | 5 -0.202 | 0.045  | 7.9477 | 0.159 |

| The AC and PAC of ecological land carrying capacity in Qinghai                      |                                                                                     |          |        |        |       |
|-------------------------------------------------------------------------------------|-------------------------------------------------------------------------------------|----------|--------|--------|-------|
| Autocorrelation                                                                     | Partial Correlation                                                                 | AC       | PAC    | Q-Stat | Prob  |
| 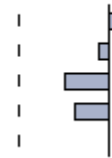 |  | 1 0.289  | 0.289  | 0.8033 | 0.370 |
|                                                                                     |                                                                                     | 2 -0.084 | -0.183 | 0.8888 | 0.641 |
|                                                                                     |                                                                                     | 3 -0.393 | -0.351 | 3.3550 | 0.340 |
|                                                                                     |                                                                                     | 4 -0.316 | -0.143 | 5.7581 | 0.218 |
|                                                                                     |                                                                                     | 5 0.004  | 0.083  | 5.7589 | 0.330 |

The AC and PAC of ARIAM(1,1,3)

The cultivated land carrying capacity in Shandong:

First-order difference unit root test results of cultivated land carrying capacity in Shandong

|                                        | t-Statistic | Prob.*  |
|----------------------------------------|-------------|---------|
| Augmented Dickey-Fuller test statistic | -6.8169     | 0.0002  |
| Test critical values:                  | 1% level    | -3.1095 |
|                                        | 5% level    | -2.0439 |
|                                        | 10% level   | -1.5973 |

| Autocorrelation                                                                   |                                                                                   | Partial Correlation |        | AC     | PAC    | Q-Stat | Prob |
|-----------------------------------------------------------------------------------|-----------------------------------------------------------------------------------|---------------------|--------|--------|--------|--------|------|
|  |  | 1                   | 0.107  | 0.107  | 0.1091 | 0.741  |      |
|                                                                                   |                                                                                   | 2                   | -0.138 | -0.151 | 0.3380 | 0.844  |      |
|                                                                                   |                                                                                   | 3                   | -0.249 | -0.224 | 1.3325 | 0.721  |      |
|                                                                                   |                                                                                   | 4                   | -0.046 | -0.019 | 1.3831 | 0.847  |      |
|                                                                                   |                                                                                   | 5                   | -0.173 | -0.250 | 2.8237 | 0.727  |      |

The AC and PAC of cultivated land carrying capacity in Shandong

| Autocorrelation                                                                   | Partial Correlation                                                               | AC | PAC    | Q-Stat | Prob   |       |
|-----------------------------------------------------------------------------------|-----------------------------------------------------------------------------------|----|--------|--------|--------|-------|
|  |  | 1  | -0.366 | -0.366 | 1.2840 | 0.257 |
|                                                                                   |                                                                                   | 2  | -0.335 | -0.541 | 2.6329 | 0.268 |
|                                                                                   |                                                                                   | 3  | 0.365  | -0.035 | 4.7680 | 0.190 |
|                                                                                   |                                                                                   | 4  | -0.165 | -0.250 | 5.4188 | 0.247 |
|                                                                                   |                                                                                   | 5  | 0.000  | 0.012  | 5.4188 | 0.367 |

The AC and PAC of ARIAM(1,1,2)

The construction land carrying capacity in Shandong:

First-order difference unit root test results of construction land carrying capacity in Shandong

|                                        | t-Statistic | Prob.*  |
|----------------------------------------|-------------|---------|
| Augmented Dickey-Fuller test statistic | -2.4782     | 0.0251  |
| Test critical values:                  | 1% level    | -3.1095 |
|                                        | 5% level    | -2.0439 |
|                                        | 10% level   | -1.5973 |

| Autocorrelation                                                                     |                                                                                     | Partial Correlation |        | AC     | PAC    | Q-Stat | Prob. |
|-------------------------------------------------------------------------------------|-------------------------------------------------------------------------------------|---------------------|--------|--------|--------|--------|-------|
|  |  | 1                   | -0.352 | -0.352 | 1.1873 | 0.276  |       |
|                                                                                     |                                                                                     | 2                   | -0.149 | -0.311 | 1.4536 | 0.483  |       |
|                                                                                     |                                                                                     | 3                   | -0.084 | -0.332 | 1.5673 | 0.667  |       |
|                                                                                     |                                                                                     | 4                   | 0.073  | -0.227 | 1.6967 | 0.791  |       |
|                                                                                     |                                                                                     | 5                   | 0.012  | -0.206 | 1.7031 | 0.889  |       |

The AC and PAC of construction land carrying capacity in Shandong

| Autocorrelation                                                                     | Partial Correlation                                                                 | AC | PAC    | Q-Stat | Prob   |       |
|-------------------------------------------------------------------------------------|-------------------------------------------------------------------------------------|----|--------|--------|--------|-------|
|  |  | 1  | -0.375 | -0.375 | 1.3512 | 0.245 |
|                                                                                     |                                                                                     | 2  | -0.061 | -0.235 | 1.3957 | 0.498 |
|                                                                                     |                                                                                     | 3  | 0.320  | 0.251  | 3.0349 | 0.386 |
|                                                                                     |                                                                                     | 4  | -0.394 | -0.233 | 6.7521 | 0.150 |
|                                                                                     |                                                                                     | 5  | 0.010  | -0.219 | 6.7566 | 0.239 |

The AC and PAC of ARIAM(1,1,3)

The ecological land carrying capacity in Shandong:

First-order difference unit root test results of ecological land carrying capacity in Shandong

|                                        | t-Statistic | Prob.*  |
|----------------------------------------|-------------|---------|
| Augmented Dickey-Fuller test statistic | -3.3093     | 0.0075  |
| Test critical values:                  | 1% level    | -3.1095 |
|                                        | 5% level    | -2.0439 |
|                                        | 10% level   | -1.5973 |



| Autocorrelation                                                                   | Partial Correlation                                                               | AC | PAC    | Q-Stat | Prob   |       |
|-----------------------------------------------------------------------------------|-----------------------------------------------------------------------------------|----|--------|--------|--------|-------|
|  |  | 1  | 0.148  | 0.148  | 0.2112 | 0.646 |
|  |  | 2  | -0.166 | -0.192 | 0.5423 | 0.762 |
|  |  | 3  | 0.055  | 0.120  | 0.5904 | 0.899 |
|  |  | 4  | -0.175 | -0.258 | 1.3278 | 0.857 |
|  |  | 5  | -0.362 | -0.277 | 7.6071 | 0.179 |

The AC and PAC of ecological land carrying capacity in Shandong

| Autocorrelation                                                                   | Partial Correlation                                                               | AC | PAC    | Q-Stat | Prob   |       |
|-----------------------------------------------------------------------------------|-----------------------------------------------------------------------------------|----|--------|--------|--------|-------|
| 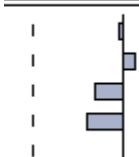 |  | 1  | -0.029 | -0.029 | 0.0082 | 0.928 |
|                                                                                   |                                                                                   | 2  | 0.107  | 0.106  | 0.1463 | 0.929 |
|                                                                                   |                                                                                   | 3  | -0.254 | -0.252 | 1.1823 | 0.757 |
|                                                                                   |                                                                                   | 4  | -0.328 | -0.374 | 3.7604 | 0.439 |
|                                                                                   |                                                                                   | 5  | 0.004  | 0.031  | 3.7612 | 0.584 |

The AC and PAC of ARIAM(1,1,2)

The cultivated land carrying capacity in Shanxi:

First-order difference unit root test results of cultivated land carrying capacity in Shanxi

|                                        | t-Statistic | Prob.*  |
|----------------------------------------|-------------|---------|
| Augmented Dickey-Fuller test statistic | -23.3822    | 0.0001  |
| Test critical values:                  | 1% level    | -3.1095 |
|                                        | 5% level    | -2.0439 |
|                                        | 10% level   | -1.5973 |

| Autocorrelation                                                                     |                                                                                     | Partial Correlation |        | AC     | PAC    | Q-Stat | Prob |
|-------------------------------------------------------------------------------------|-------------------------------------------------------------------------------------|---------------------|--------|--------|--------|--------|------|
| 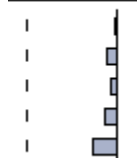 |  | 1                   | -0.022 | -0.022 | 0.0044 | 0.947  |      |
|                                                                                     |                                                                                     | 2                   | -0.087 | -0.087 | 0.0951 | 0.954  |      |
|                                                                                     |                                                                                     | 3                   | -0.059 | -0.063 | 0.1504 | 0.985  |      |
|                                                                                     |                                                                                     | 4                   | -0.109 | -0.121 | 0.4354 | 0.979  |      |
|                                                                                     |                                                                                     | 5                   | -0.224 | -0.249 | 2.8398 | 0.725  |      |

The AC and PAC of cultivated land carrying capacity in Shanxi

| Autocorrelation                                                                     | Partial Correlation                                                                 | AC | PAC    | Q-Stat | Prob   |       |
|-------------------------------------------------------------------------------------|-------------------------------------------------------------------------------------|----|--------|--------|--------|-------|
|  |  | 1  | -0.094 | -0.094 | 0.0849 | 0.771 |
|                                                                                     |                                                                                     | 2  | -0.126 | -0.136 | 0.2767 | 0.871 |
|                                                                                     |                                                                                     | 3  | -0.054 | -0.082 | 0.3229 | 0.956 |
|                                                                                     |                                                                                     | 4  | -0.226 | -0.268 | 1.5506 | 0.818 |
|                                                                                     |                                                                                     | 5  | 0.000  | -0.090 | 1.5506 | 0.907 |

The AC and PAC of ARIAM(1,1,1)

The construction land carrying capacity in Shanxi:

First-order difference unit root test results of construction land carrying capacity in Shanxi

|                                        | t-Statistic | Prob.*  |
|----------------------------------------|-------------|---------|
| Augmented Dickey-Fuller test statistic | -17.9987    | 0.0001  |
| Test critical values:                  | 1% level    | -3.1095 |
|                                        | 5% level    | -2.0439 |
|                                        | 10% level   | -1.5973 |

| Autocorrelation                                                                   | Partial Correlation                                                               | AC | PAC    | Q-Stat | Prob   |       |
|-----------------------------------------------------------------------------------|-----------------------------------------------------------------------------------|----|--------|--------|--------|-------|
| 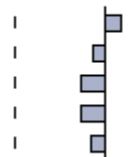 |  | 1  | 0.151  | 0.151  | 0.2185 | 0.640 |
|                                                                                   |                                                                                   | 2  | -0.102 | -0.127 | 0.3424 | 0.843 |
|                                                                                   |                                                                                   | 3  | -0.206 | -0.176 | 1.0204 | 0.796 |
|                                                                                   |                                                                                   | 4  | -0.214 | -0.179 | 2.1186 | 0.714 |
|                                                                                   |                                                                                   | 5  | -0.129 | -0.129 | 2.9232 | 0.712 |

The AC and PAC of construction land carrying capacity in Shanxi

| Autocorrelation                                                                   | Partial Correlation                                                               | AC | PAC    | Q-Stat | Prob   |       |
|-----------------------------------------------------------------------------------|-----------------------------------------------------------------------------------|----|--------|--------|--------|-------|
| 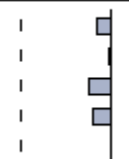 |  | 1  | -0.126 | -0.126 | 0.1523 | 0.696 |
|                                                                                   |                                                                                   | 2  | -0.020 | -0.036 | 0.1571 | 0.924 |
|                                                                                   |                                                                                   | 3  | -0.192 | -0.202 | 0.7447 | 0.863 |
|                                                                                   |                                                                                   | 4  | -0.163 | -0.229 | 1.3805 | 0.848 |
|                                                                                   |                                                                                   | 5  | 0.000  | -0.087 | 1.3805 | 0.926 |

The AC and PAC of ARIAM(2,1,1)

The ecological land carrying capacity in Shanxi:

First-order difference unit root test results of ecological land carrying capacity in Shanxi

|                                        | t-Statistic | Prob.*  |
|----------------------------------------|-------------|---------|
| Augmented Dickey-Fuller test statistic | -47.3554    | 0.0001  |
| Test critical values:                  | 1% level    | -3.1095 |
|                                        | 5% level    | -2.0439 |
|                                        | 10% level   | -1.5973 |

| Autocorrelation                                                                     |                                                                                     | Partial Correlation |        | AC     | PAC    | Q-Stat | Prob. |
|-------------------------------------------------------------------------------------|-------------------------------------------------------------------------------------|---------------------|--------|--------|--------|--------|-------|
|  |  | 1                   | -0.019 | -0.019 | 0.0036 | 0.952  |       |
|  |  | 2                   | -0.067 | -0.067 | 0.0571 | 0.972  |       |
|  |  | 3                   | -0.082 | -0.086 | 0.1658 | 0.983  |       |
|  |  | 4                   | -0.126 | -0.136 | 0.5478 | 0.969  |       |
|  |  | 5                   | -0.205 | -0.232 | 2.5712 | 0.766  |       |

The AC and PAC of ecological land carrying capacity in Shanxi

| Autocorrelation                                                                     | Partial Correlation                                                                 | AC | PAC    | Q-Stat | Prob   |       |
|-------------------------------------------------------------------------------------|-------------------------------------------------------------------------------------|----|--------|--------|--------|-------|
|  |  | 1  | -0.127 | -0.127 | 0.1550 | 0.694 |
|                                                                                     |                                                                                     | 2  | -0.044 | -0.062 | 0.1787 | 0.915 |
|                                                                                     |                                                                                     | 3  | -0.239 | -0.258 | 1.0951 | 0.778 |
|                                                                                     |                                                                                     | 4  | -0.090 | -0.178 | 1.2878 | 0.863 |
|                                                                                     |                                                                                     | 5  | 0.000  | -0.090 | 1.2878 | 0.936 |

The AC and PAC of ARIAM(1,1,3)

The cultivated land carrying capacity in Shaanxi:

First-order difference unit root test results of cultivated land carrying capacity in Shaanxi

|                                        | t-Statistic | Prob.*  |
|----------------------------------------|-------------|---------|
| Augmented Dickey-Fuller test statistic | -7.6451     | 0.0001  |
| Test critical values:                  | 1% level    | -3.0074 |
|                                        | 5% level    | -2.0211 |
|                                        | 10% level   | -1.5972 |

| Autocorrelation                                                                   | Partial Correlation                                                               | AC       | PAC    | Q-Stat | Prob  |
|-----------------------------------------------------------------------------------|-----------------------------------------------------------------------------------|----------|--------|--------|-------|
| 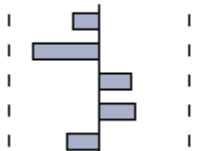 |  | 1 -0.232 | -0.232 | 0.5159 | 0.473 |
|                                                                                   |                                                                                   | 2 -0.595 | -0.686 | 4.7684 | 0.092 |
|                                                                                   |                                                                                   | 3 0.288  | -0.207 | 6.0945 | 0.107 |
|                                                                                   |                                                                                   | 4 0.319  | -0.068 | 8.5308 | 0.074 |
|                                                                                   |                                                                                   | 5 -0.279 | -0.063 | 12.278 | 0.031 |

The AC and PAC of cultivated land carrying capacity in Shaanxi

| Autocorrelation                                                                   | Partial Correlation                                                               | AC       | PAC    | Q-Stat | Prob  |
|-----------------------------------------------------------------------------------|-----------------------------------------------------------------------------------|----------|--------|--------|-------|
| 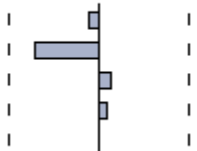 |  | 1 -0.094 | -0.094 | 0.0856 | 0.770 |
|                                                                                   |                                                                                   | 2 -0.571 | -0.585 | 3.9995 | 0.135 |
|                                                                                   |                                                                                   | 3 0.100  | -0.062 | 4.1609 | 0.245 |
|                                                                                   |                                                                                   | 4 0.072  | -0.393 | 4.2838 | 0.369 |
|                                                                                   |                                                                                   | 5 -0.006 | -0.041 | 4.2858 | 0.509 |

The AC and PAC of ARIAM(1,1,2)

The construction land carrying capacity in Shaanxi:

Third-order difference unit root test results of construction land carrying capacity in Shaanxi

|                                        | t-Statistic | Prob.*  |
|----------------------------------------|-------------|---------|
| Augmented Dickey-Fuller test statistic | -4.5497     | 0.0027  |
| Test critical values:                  | 1% level    | -3.2714 |
|                                        | 5% level    | -2.0823 |
|                                        | 10% level   | -1.5998 |

| Autocorrelation                                                                     | Partial Correlation                                                                 | AC       | PAC    | Q-Stat | Prob  |
|-------------------------------------------------------------------------------------|-------------------------------------------------------------------------------------|----------|--------|--------|-------|
| 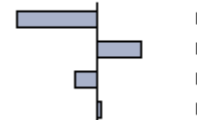 |  | 1 -0.713 | -0.713 | 4.4536 | 0.035 |
|                                                                                     |                                                                                     | 2 0.389  | -0.245 | 6.2176 | 0.045 |
|                                                                                     |                                                                                     | 3 -0.204 | -0.071 | 6.9433 | 0.074 |
|                                                                                     |                                                                                     | 4 0.028  | -0.190 | 6.9711 | 0.137 |

The AC and PAC of construction land carrying capacity in Shaanxi

| Autocorrelation                                                                     | Partial Correlation                                                                 | AC       | PAC    | Q-Stat | Prob  |
|-------------------------------------------------------------------------------------|-------------------------------------------------------------------------------------|----------|--------|--------|-------|
| 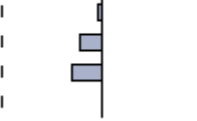 |  | 1 -0.033 | -0.033 | 0.0093 | 0.923 |
|                                                                                     |                                                                                     | 2 -0.196 | -0.197 | 0.4552 | 0.796 |
|                                                                                     |                                                                                     | 3 -0.270 | -0.296 | 1.7301 | 0.630 |
|                                                                                     |                                                                                     | 4 -0.002 | -0.090 | 1.7303 | 0.785 |

The AC and PAC of ARIAM(1,3,1)

The ecological land carrying capacity in Shaanxi:

Second-order difference unit root test results of ecological land carrying capacity in Shaanxi

|                                        | t-Statistic | Prob.*  |
|----------------------------------------|-------------|---------|
| Augmented Dickey-Fuller test statistic | -4.3449     | 0.0279  |
| Test critical values:                  | 1% level    | -5.6046 |
|                                        | 5% level    | -3.6948 |
|                                        | 10% level   | -2.9828 |

| Autocorrelation                                                                   | Partial Correlation                                                               | AC | PAC    | Q-Stat | Prob.  |       |
|-----------------------------------------------------------------------------------|-----------------------------------------------------------------------------------|----|--------|--------|--------|-------|
|  |  | 1  | -0.226 | -0.226 | 0.4481 | 0.503 |
|  |  | 2  | -0.074 | -0.132 | 0.5115 | 0.774 |
|  |  | 3  | -0.110 | -0.170 | 0.7239 | 0.868 |
|  |  | 4  | -0.090 | -0.190 | 1.0063 | 0.909 |

The AC and PAC of ecological land carrying capacity in Shaanxi

| Autocorrelation                                                                   | Partial Correlation                                                               | AC | PAC    | Q-Stat | Prob   |       |
|-----------------------------------------------------------------------------------|-----------------------------------------------------------------------------------|----|--------|--------|--------|-------|
|  |  | 1  | 0.000  | 0.000  | 2.E-06 | 0.999 |
|                                                                                   |                                                                                   | 2  | -0.501 | -0.501 | 2.9287 | 0.231 |
|                                                                                   |                                                                                   | 3  | -0.133 | -0.177 | 3.2390 | 0.356 |
|                                                                                   |                                                                                   | 4  | 0.134  | -0.178 | 3.8650 | 0.425 |

The AC and PAC of ARIAM(2,2,1)

The cultivated land carrying capacity in Sichuan:

First-order difference unit root test results of cultivated land carrying capacity in Sichuan

|                                        | t-Statistic | Prob.*  |
|----------------------------------------|-------------|---------|
| Augmented Dickey-Fuller test statistic | -13.2049    | 0.0001  |
| Test critical values:                  | 1% level    | -3.1095 |
|                                        | 5% level    | -2.0439 |
|                                        | 10% level   | -1.5973 |

| Autocorrelation                                                                     | Partial Correlation                                                                 | AC | PAC    | Q-Stat | Prob   |       |
|-------------------------------------------------------------------------------------|-------------------------------------------------------------------------------------|----|--------|--------|--------|-------|
| 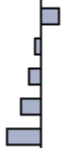 |  | 1  | 0.157  | 0.157  | 0.2374 | 0.626 |
|                                                                                     |                                                                                     | 2  | -0.056 | -0.082 | 0.2745 | 0.872 |
|                                                                                     |                                                                                     | 3  | -0.114 | -0.094 | 0.4814 | 0.923 |
|                                                                                     |                                                                                     | 4  | -0.178 | -0.154 | 1.2410 | 0.871 |
|                                                                                     |                                                                                     | 5  | -0.310 | -0.290 | 5.8557 | 0.321 |

The AC and PAC of cultivated land carrying capacity in Sichuan

| Autocorrelation                                                                     | Partial Correlation                                                                 | AC | PAC    | Q-Stat | Prob   |       |
|-------------------------------------------------------------------------------------|-------------------------------------------------------------------------------------|----|--------|--------|--------|-------|
|  |  | 1  | -0.366 | -0.366 | 1.2852 | 0.257 |
|                                                                                     |                                                                                     | 2  | -0.133 | -0.308 | 1.4963 | 0.473 |
|                                                                                     |                                                                                     | 3  | 0.033  | -0.182 | 1.5139 | 0.679 |
|                                                                                     |                                                                                     | 4  | -0.015 | -0.154 | 1.5195 | 0.823 |
|                                                                                     |                                                                                     | 5  | -0.019 | -0.141 | 1.5376 | 0.909 |

The AC and PAC of ARIAM(1,1,1)

The construction land carrying capacity in Sichuan:

First-order difference unit root test results of construction land carrying capacity in Sichuan

|                                        | t-Statistic | Prob.*  |
|----------------------------------------|-------------|---------|
| Augmented Dickey-Fuller test statistic | -11.9161    | 0.0001  |
| Test critical values:                  | 1% level    | -3.1095 |
|                                        | 5% level    | -2.0439 |
|                                        | 10% level   | -1.5973 |

| Autocorrelation                                                                   | Partial Correlation                                                               | AC       | PAC    | Q-Stat | Prob  |
|-----------------------------------------------------------------------------------|-----------------------------------------------------------------------------------|----------|--------|--------|-------|
|  |  | 1 -0.067 | -0.067 | 0.0434 | 0.835 |
|                                                                                   |                                                                                   | 2 -0.026 | -0.030 | 0.0514 | 0.975 |
|                                                                                   |                                                                                   | 3 -0.155 | -0.160 | 0.4380 | 0.932 |
|                                                                                   |                                                                                   | 4 -0.021 | -0.046 | 0.4490 | 0.978 |
|                                                                                   |                                                                                   | 5 -0.230 | -0.254 | 2.9916 | 0.701 |

The AC and PAC of construction land carrying capacity in Sichuan

| Autocorrelation                                                                   | Partial Correlation                                                               | AC       | PAC    | Q-Stat | Prob  |
|-----------------------------------------------------------------------------------|-----------------------------------------------------------------------------------|----------|--------|--------|-------|
| 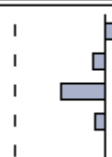 |  | 1 0.100  | 0.100  | 0.0959 | 0.757 |
|                                                                                   |                                                                                   | 2 -0.108 | -0.119 | 0.2349 | 0.889 |
|                                                                                   |                                                                                   | 3 -0.396 | -0.381 | 2.7379 | 0.434 |
|                                                                                   |                                                                                   | 4 -0.098 | -0.050 | 2.9670 | 0.563 |
|                                                                                   |                                                                                   | 5 0.001  | -0.074 | 2.9670 | 0.705 |

The AC and PAC of ARIAM(2,1,1)

The ecological land carrying capacity in Sichuan:

First-order difference unit root test results of ecological land carrying capacity in Sichuan

|                                        | t-Statistic | Prob.*  |
|----------------------------------------|-------------|---------|
| Augmented Dickey-Fuller test statistic | -12.8369    | 0.0001  |
| Test critical values:                  | 1% level    | -3.1095 |
|                                        | 5% level    | -2.0439 |
|                                        | 10% level   | -1.5973 |

| Autocorrelation                                                                     | Partial Correlation                                                                 | AC       | PAC    | Q-Stat | Prob  |
|-------------------------------------------------------------------------------------|-------------------------------------------------------------------------------------|----------|--------|--------|-------|
| 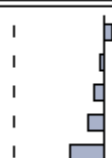 |  | 1 0.080  | 0.080  | 0.0610 | 0.805 |
|                                                                                     |                                                                                     | 2 -0.033 | -0.040 | 0.0745 | 0.963 |
|                                                                                     |                                                                                     | 3 -0.098 | -0.092 | 0.2268 | 0.973 |
|                                                                                     |                                                                                     | 4 -0.152 | -0.140 | 0.7786 | 0.941 |
|                                                                                     |                                                                                     | 5 -0.297 | -0.293 | 5.0136 | 0.414 |

The AC and PAC of ecological land carrying capacity in Sichuan

| Autocorrelation                                                                     | Partial Correlation                                                                 | AC       | PAC    | Q-Stat | Prob  |
|-------------------------------------------------------------------------------------|-------------------------------------------------------------------------------------|----------|--------|--------|-------|
| 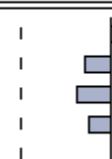 |  | 1 0.228  | 0.228  | 0.4998 | 0.480 |
|                                                                                     |                                                                                     | 2 -0.232 | -0.300 | 1.1453 | 0.564 |
|                                                                                     |                                                                                     | 3 -0.301 | -0.190 | 2.5946 | 0.458 |
|                                                                                     |                                                                                     | 4 -0.195 | -0.163 | 3.5053 | 0.477 |
|                                                                                     |                                                                                     | 5 -0.000 | -0.053 | 3.5053 | 0.623 |

The AC and PAC of ARIAM(1,1,2)

The cultivated land carrying capacity in Tianjin:

First-order difference unit root test results of cultivated land carrying capacity in Tianjin

|                                        | t-Statistic | Prob.*  |
|----------------------------------------|-------------|---------|
| Augmented Dickey-Fuller test statistic | -2.4182     | 0.0281  |
| Test critical values:                  | 1% level    | -3.1095 |
|                                        | 5% level    | -2.0439 |
|                                        | 10% level   | -1.5973 |

| Autocorrelation                                                                   | Partial Correlation                                                               | AC       | PAC    | Q-Stat | Prob  |
|-----------------------------------------------------------------------------------|-----------------------------------------------------------------------------------|----------|--------|--------|-------|
| 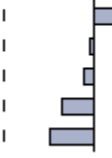 |  | 1 0.320  | 0.320  | 0.9808 | 0.322 |
|                                                                                   |                                                                                   | 2 -0.025 | -0.142 | 0.9885 | 0.610 |
|                                                                                   |                                                                                   | 3 -0.094 | -0.045 | 1.1305 | 0.770 |
|                                                                                   |                                                                                   | 4 -0.292 | -0.282 | 3.1810 | 0.528 |
|                                                                                   |                                                                                   | 5 -0.408 | -0.285 | 11.163 | 0.048 |

The AC and PAC of cultivated land carrying capacity in Tianjin

| Autocorrelation                                                                   | Partial Correlation                                                               | AC       | PAC    | Q-Stat | Prob  |
|-----------------------------------------------------------------------------------|-----------------------------------------------------------------------------------|----------|--------|--------|-------|
| 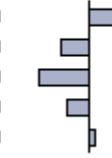 |  | 1 0.356  | 0.356  | 1.2198 | 0.269 |
|                                                                                   |                                                                                   | 2 -0.252 | -0.435 | 1.9841 | 0.371 |
|                                                                                   |                                                                                   | 3 -0.446 | -0.228 | 5.1634 | 0.160 |
|                                                                                   |                                                                                   | 4 -0.200 | -0.022 | 6.1229 | 0.190 |
|                                                                                   |                                                                                   | 5 0.042  | -0.103 | 6.2060 | 0.287 |

The AC and PAC of ARIAM(1,1,3)

The construction land carrying capacity in Tianjin:

First-order difference unit root test results of construction land carrying capacity in Tianjin

|                                        | t-Statistic | Prob.*  |
|----------------------------------------|-------------|---------|
| Augmented Dickey-Fuller test statistic | -1.6825     | 0.0872  |
| Test critical values:                  | 1% level    | -3.1095 |
|                                        | 5% level    | -2.0439 |
|                                        | 10% level   | -1.5973 |

| Autocorrelation                                                                     | Partial Correlation                                                                 | AC       | PAC    | Q-Stat | Prob  |
|-------------------------------------------------------------------------------------|-------------------------------------------------------------------------------------|----------|--------|--------|-------|
| 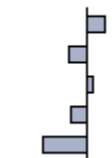 |  | 1 0.156  | 0.156  | 0.2335 | 0.629 |
|                                                                                     |                                                                                     | 2 -0.163 | -0.192 | 0.5521 | 0.759 |
|                                                                                     |                                                                                     | 3 0.052  | 0.119  | 0.5955 | 0.897 |
|                                                                                     |                                                                                     | 4 -0.148 | -0.229 | 1.1198 | 0.891 |
|                                                                                     |                                                                                     | 5 -0.397 | -0.325 | 8.6951 | 0.122 |

The AC and PAC of construction land carrying capacity in Tianjin

| Autocorrelation                                                                     | Partial Correlation                                                                 | AC       | PAC    | Q-Stat | Prob  |
|-------------------------------------------------------------------------------------|-------------------------------------------------------------------------------------|----------|--------|--------|-------|
|  |  | 1 0.415  | 0.415  | 1.6496 | 0.199 |
|                                                                                     |                                                                                     | 2 -0.242 | -0.500 | 2.3548 | 0.308 |
|                                                                                     |                                                                                     | 3 -0.472 | -0.184 | 5.9247 | 0.115 |
|                                                                                     |                                                                                     | 4 -0.253 | -0.033 | 7.4584 | 0.114 |
|                                                                                     |                                                                                     | 5 0.053  | -0.049 | 7.5933 | 0.180 |

The AC and PAC of ARIAM(1,1,2)

The ecological land carrying capacity in Tianjin:

Second-order difference unit root test results of ecological land carrying capacity in Tianjin

|                                        | t-Statistic | Prob.*  |
|----------------------------------------|-------------|---------|
| Augmented Dickey-Fuller test statistic | -1.8554     | 0.0667  |
| Test critical values:                  | 1% level    | -3.1095 |
|                                        | 5% level    | -2.0439 |
|                                        | 10% level   | -1.5973 |

| Autocorrelation                                                                   | Partial Correlation                                                               | AC | PAC    | Q-Stat | Prob.  |       |
|-----------------------------------------------------------------------------------|-----------------------------------------------------------------------------------|----|--------|--------|--------|-------|
| 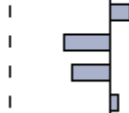 |  | 1  | 0.183  | 0.183  | 0.2928 | 0.588 |
|                                                                                   |                                                                                   | 2  | -0.416 | -0.465 | 2.3099 | 0.315 |
|                                                                                   |                                                                                   | 3  | -0.345 | -0.196 | 4.3954 | 0.222 |
|                                                                                   |                                                                                   | 4  | 0.078  | 0.005  | 4.6089 | 0.330 |

The AC and PAC of ecological land carrying capacity in Tianjin

| Autocorrelation                                                                   | Partial Correlation                                                               | AC | PAC    | Q-Stat | Prob   |       |
|-----------------------------------------------------------------------------------|-----------------------------------------------------------------------------------|----|--------|--------|--------|-------|
|  |  | 1  | 0.254  | 0.254  | 0.5664 | 0.452 |
|                                                                                   |                                                                                   | 2  | -0.515 | -0.620 | 3.6655 | 0.160 |
|                                                                                   |                                                                                   | 3  | -0.270 | 0.175  | 4.9368 | 0.176 |
|                                                                                   |                                                                                   | 4  | 0.031  | -0.413 | 4.9694 | 0.290 |

The AC and PAC of ARIAM(1,2,1)

The cultivated land carrying capacity in Tibet:

First-order difference unit root test results of cultivated land carrying capacity in Tibet

|                                        | t-Statistic | Prob.*  |
|----------------------------------------|-------------|---------|
| Augmented Dickey-Fuller test statistic | -1.5711     | 0.1074  |
| Test critical values:                  | 1% level    | -3.5639 |
|                                        | 5% level    | -2.1574 |
|                                        | 10% level   | -1.6104 |

| Autocorrelation                                                                     | Partial Correlation                                                                 | AC | PAC    | Q-Stat | Prob   |       |
|-------------------------------------------------------------------------------------|-------------------------------------------------------------------------------------|----|--------|--------|--------|-------|
| 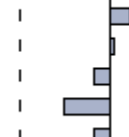 |  | 1  | 0.172  | 0.172  | 0.2848 | 0.594 |
|                                                                                     |                                                                                     | 2  | 0.032  | 0.002  | 0.2970 | 0.862 |
|                                                                                     |                                                                                     | 3  | -0.143 | -0.153 | 0.6224 | 0.891 |
|                                                                                     |                                                                                     | 4  | -0.418 | -0.389 | 4.8209 | 0.306 |
|                                                                                     |                                                                                     | 5  | -0.143 | -0.026 | 5.8064 | 0.326 |

The AC and PAC of cultivated land carrying capacity in Tibet

| Autocorrelation                                                                     | Partial Correlation                                                                 | AC | PAC    | Q-Stat | Prob   |       |
|-------------------------------------------------------------------------------------|-------------------------------------------------------------------------------------|----|--------|--------|--------|-------|
| 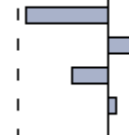 |  | 1  | -0.742 | -0.742 | 5.2830 | 0.022 |
|                                                                                     |                                                                                     | 2  | 0.481  | -0.153 | 8.0648 | 0.018 |
|                                                                                     |                                                                                     | 3  | -0.321 | -0.052 | 9.7139 | 0.021 |
|                                                                                     |                                                                                     | 4  | 0.074  | -0.336 | 9.8439 | 0.043 |
|                                                                                     |                                                                                     | 5  | 0.008  | -0.248 | 9.8468 | 0.080 |

The AC and PAC of ARIAM(1,1,1)

The construction land carrying capacity in Tibet:

First-order difference unit root test results of construction land carrying capacity in Tibet

|                                        | t-Statistic | Prob.*  |
|----------------------------------------|-------------|---------|
| Augmented Dickey-Fuller test statistic | -4.3258     | 0.0033  |
| Test critical values:                  | 1% level    | -3.2714 |
|                                        | 5% level    | -2.0823 |
|                                        | 10% level   | -1.5998 |

| Autocorrelation                                                                   | Partial Correlation                                                               | AC       | PAC    | Q-Stat | Prob  |
|-----------------------------------------------------------------------------------|-----------------------------------------------------------------------------------|----------|--------|--------|-------|
| 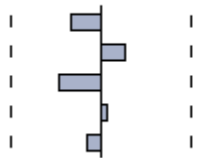 |  | 1 -0.269 | -0.269 | 0.6947 | 0.405 |
|                                                                                   |                                                                                   | 2 0.219  | 0.158  | 1.2691 | 0.530 |
|                                                                                   |                                                                                   | 3 -0.377 | -0.315 | 3.5457 | 0.315 |
|                                                                                   |                                                                                   | 4 0.056  | -0.140 | 3.6218 | 0.460 |
|                                                                                   |                                                                                   | 5 -0.129 | -0.053 | 4.4192 | 0.491 |

The AC and PAC of construction land carrying capacity in Tibet

| Autocorrelation                                                                   | Partial Correlation                                                               | AC       | PAC    | Q-Stat | Prob  |
|-----------------------------------------------------------------------------------|-----------------------------------------------------------------------------------|----------|--------|--------|-------|
| 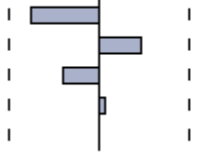 |  | 1 -0.617 | -0.617 | 3.6540 | 0.056 |
|                                                                                   |                                                                                   | 2 0.370  | -0.017 | 5.2977 | 0.071 |
|                                                                                   |                                                                                   | 3 -0.324 | -0.166 | 6.9816 | 0.072 |
|                                                                                   |                                                                                   | 4 0.063  | -0.330 | 7.0774 | 0.132 |
|                                                                                   |                                                                                   | 5 0.008  | -0.123 | 7.0806 | 0.215 |

The AC and PAC of ARIAM(1,1,1)

The ecological land carrying capacity in Tibet:

First-order difference unit root test results of ecological land carrying capacity in Tibet

|                                        | t-Statistic | Prob.*  |
|----------------------------------------|-------------|---------|
| Augmented Dickey-Fuller test statistic | 5.9443      | 0.0997  |
| Test critical values:                  | 1% level    | -3.0074 |
|                                        | 5% level    | -2.0211 |
|                                        | 10% level   | -1.5972 |

| Autocorrelation                                                                     | Partial Correlation                                                                 | AC       | PAC    | Q-Stat | Prob  |
|-------------------------------------------------------------------------------------|-------------------------------------------------------------------------------------|----------|--------|--------|-------|
|  |  | 1 0.196  | 0.196  | 0.3675 | 0.544 |
|                                                                                     |                                                                                     | 2 0.048  | 0.010  | 0.3950 | 0.821 |
|                                                                                     |                                                                                     | 3 -0.130 | -0.147 | 0.6673 | 0.881 |
|                                                                                     |                                                                                     | 4 -0.444 | -0.416 | 5.3990 | 0.249 |
|                                                                                     |                                                                                     | 5 -0.169 | -0.023 | 6.7716 | 0.238 |

The AC and PAC of ecological land carrying capacity in Tibet

| Autocorrelation                                                                     | Partial Correlation                                                                 | AC       | PAC    | Q-Stat | Prob  |
|-------------------------------------------------------------------------------------|-------------------------------------------------------------------------------------|----------|--------|--------|-------|
| 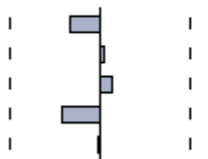 |  | 1 -0.274 | -0.274 | 0.7190 | 0.396 |
|                                                                                     |                                                                                     | 2 0.039  | -0.039 | 0.7373 | 0.692 |
|                                                                                     |                                                                                     | 3 0.100  | 0.109  | 0.8984 | 0.826 |
|                                                                                     |                                                                                     | 4 -0.342 | -0.311 | 3.7002 | 0.448 |
|                                                                                     |                                                                                     | 5 -0.024 | -0.234 | 3.7277 | 0.589 |

The AC and PAC of ARIAM(2,1,2)

The cultivated land carrying capacity in Yunnan:

First-order difference unit root test results of cultivated land carrying capacity in Yunnan

|                                        | t-Statistic | Prob.*  |
|----------------------------------------|-------------|---------|
| Augmented Dickey-Fuller test statistic | -2.3212     | 0.0409  |
| Test critical values:                  | 1% level    | -3.5639 |
|                                        | 5% level    | -2.1574 |
|                                        | 10% level   | -1.6104 |



| Autocorrelation                                                                   | Partial Correlation                                                               | AC       | PAC    | Q-Stat | Prob  |
|-----------------------------------------------------------------------------------|-----------------------------------------------------------------------------------|----------|--------|--------|-------|
| 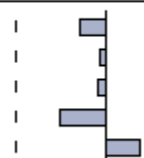 |  | 1 -0.239 | -0.239 | 0.5464 | 0.460 |
|                                                                                   |                                                                                   | 2 -0.065 | -0.130 | 0.5976 | 0.742 |
|                                                                                   |                                                                                   | 3 -0.081 | -0.140 | 0.7029 | 0.873 |
|                                                                                   |                                                                                   | 4 -0.424 | -0.541 | 5.0132 | 0.286 |
|                                                                                   |                                                                                   | 5 0.309  | -0.022 | 9.5902 | 0.088 |

The AC and PAC of cultivated land carrying capacity in Yunnan

| Autocorrelation                                                                   | Partial Correlation                                                               | AC       | PAC    | Q-Stat | Prob  |
|-----------------------------------------------------------------------------------|-----------------------------------------------------------------------------------|----------|--------|--------|-------|
|  |  | 1 0.076  | 0.076  | 0.0556 | 0.814 |
|                                                                                   |                                                                                   | 2 -0.381 | -0.389 | 1.7980 | 0.407 |
|                                                                                   |                                                                                   | 3 -0.176 | -0.125 | 2.2909 | 0.514 |
|                                                                                   |                                                                                   | 4 -0.020 | -0.173 | 2.3001 | 0.681 |
|                                                                                   |                                                                                   | 5 0.000  | -0.133 | 2.3001 | 0.806 |

The AC and PAC of ARIAM(1,1,2)

The construction land carrying capacity in Yunnan:

Second-order difference unit root test results of construction land carrying capacity in Yunnan

|                                        | t-Statistic | Prob.*  |
|----------------------------------------|-------------|---------|
| Augmented Dickey-Fuller test statistic | -4.9469     | 0.0011  |
| Test critical values:                  | 1% level    | -3.1095 |
|                                        | 5% level    | -2.0439 |
|                                        | 10% level   | -1.5973 |

| Autocorrelation                                                                     | Partial Correlation                                                                 | AC       | PAC    | Q-Stat | Prob  |
|-------------------------------------------------------------------------------------|-------------------------------------------------------------------------------------|----------|--------|--------|-------|
|  |  | 1 -0.352 | -0.352 | 1.0852 | 0.298 |
|                                                                                     |                                                                                     | 2 0.168  | 0.050  | 1.4129 | 0.493 |
|                                                                                     |                                                                                     | 3 -0.000 | 0.084  | 1.4129 | 0.703 |
|                                                                                     |                                                                                     | 4 -0.315 | -0.344 | 4.8880 | 0.299 |

The AC and PAC of construction land carrying capacity in Yunnan

| Autocorrelation                                                                     | Partial Correlation                                                                 | AC       | PAC    | Q-Stat | Prob  |
|-------------------------------------------------------------------------------------|-------------------------------------------------------------------------------------|----------|--------|--------|-------|
| 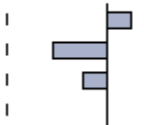 |  | 1 0.212  | 0.212  | 0.3926 | 0.531 |
|                                                                                     |                                                                                     | 2 -0.500 | -0.570 | 3.3088 | 0.191 |
|                                                                                     |                                                                                     | 3 -0.214 | 0.114  | 4.1081 | 0.250 |
|                                                                                     |                                                                                     | 4 0.002  | -0.380 | 4.1083 | 0.392 |

The AC and PAC of ARIAM(1,2,2)

The ecological land carrying capacity in Yunnan:

First-order difference unit root test results of ecological land carrying capacity in Yunnan

|                                        | t-Statistic | Prob.*  |
|----------------------------------------|-------------|---------|
| Augmented Dickey-Fuller test statistic | -3.6520     | 0.0049  |
| Test critical values:                  | 1% level    | -3.1095 |
|                                        | 5% level    | -2.0439 |
|                                        | 10% level   | -1.5973 |

| Autocorrelation                                                                   | Partial Correlation                                                               | AC | PAC    | Q-Stat | Prob   |       |
|-----------------------------------------------------------------------------------|-----------------------------------------------------------------------------------|----|--------|--------|--------|-------|
| 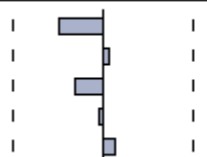 |  | 1  | -0.389 | -0.389 | 1.4498 | 0.229 |
|                                                                                   |                                                                                   | 2  | 0.063  | -0.104 | 1.4968 | 0.473 |
|                                                                                   |                                                                                   | 3  | -0.252 | -0.316 | 2.5098 | 0.474 |
|                                                                                   |                                                                                   | 4  | -0.029 | -0.335 | 2.5301 | 0.639 |
|                                                                                   |                                                                                   | 5  | 0.107  | -0.136 | 3.0778 | 0.688 |

The AC and PAC of ecological land carrying capacity in Yunnan

| Autocorrelation                                                                   | Partial Correlation                                                               | AC | PAC    | Q-Stat | Prob   |       |
|-----------------------------------------------------------------------------------|-----------------------------------------------------------------------------------|----|--------|--------|--------|-------|
| 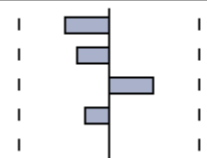 |  | 1  | -0.390 | -0.390 | 1.4583 | 0.227 |
|                                                                                   |                                                                                   | 2  | -0.286 | -0.516 | 2.4370 | 0.296 |
|                                                                                   |                                                                                   | 3  | 0.390  | 0.032  | 4.8645 | 0.182 |
|                                                                                   |                                                                                   | 4  | -0.214 | -0.193 | 5.9646 | 0.202 |
|                                                                                   |                                                                                   | 5  | -0.000 | 0.019  | 5.9646 | 0.310 |

The AC and PAC of ARIAM(1,1,3)

The cultivated land carrying capacity in Zhejiang:

First-order difference unit root test results of cultivated land carrying capacity in Zhejiang

|                                        | t-Statistic | Prob.*  |
|----------------------------------------|-------------|---------|
| Augmented Dickey-Fuller test statistic | -10.7608    | 0.0001  |
| Test critical values:                  | 1% level    | -3.1095 |
|                                        | 5% level    | -2.0439 |
|                                        | 10% level   | -1.5973 |

| Autocorrelation                                                                     |                                                                                     | Partial Correlation |        | AC     | PAC    | Q-Stat | Prob. |
|-------------------------------------------------------------------------------------|-------------------------------------------------------------------------------------|---------------------|--------|--------|--------|--------|-------|
| 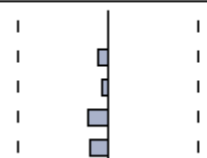 |  | 1                   | 0.001  | 0.001  | 8.E-06 | 0.998  |       |
|                                                                                     |                                                                                     | 2                   | -0.088 | -0.088 | 0.0931 | 0.955  |       |
|                                                                                     |                                                                                     | 3                   | -0.060 | -0.060 | 0.1506 | 0.985  |       |
|                                                                                     |                                                                                     | 4                   | -0.188 | -0.198 | 1.0006 | 0.910  |       |
|                                                                                     |                                                                                     | 5                   | -0.165 | -0.189 | 2.3029 | 0.806  |       |

The AC and PAC of cultivated land carrying capacity in Zhejiang

| Autocorrelation                                                                     | Partial Correlation                                                                 | AC | PAC    | Q-Stat | Prob   |       |
|-------------------------------------------------------------------------------------|-------------------------------------------------------------------------------------|----|--------|--------|--------|-------|
|  |  | 1  | -0.735 | -0.735 | 5.1798 | 0.023 |
|                                                                                     |                                                                                     | 2  | 0.418  | -0.264 | 7.2773 | 0.026 |
|                                                                                     |                                                                                     | 3  | -0.145 | 0.114  | 7.6161 | 0.055 |
|                                                                                     |                                                                                     | 4  | -0.039 | -0.047 | 7.6522 | 0.105 |
|                                                                                     |                                                                                     | 5  | 0.001  | -0.290 | 7.6522 | 0.176 |

The AC and PAC of ARIAM(1,1,2)

The construction land carrying capacity in Zhejiang:

First-order difference unit root test results of construction land carrying capacity in Zhejiang

|                                        | t-Statistic | Prob.*  |
|----------------------------------------|-------------|---------|
| Augmented Dickey-Fuller test statistic | -2.4052     | 0.0286  |
| Test critical values:                  | 1% level    | -3.1095 |
|                                        | 5% level    | -2.0439 |
|                                        | 10% level   | -1.5973 |

| Autocorrelation                                                                   | Partial Correlation                                                               | AC       | PAC    | Q-Stat | Prob  |
|-----------------------------------------------------------------------------------|-----------------------------------------------------------------------------------|----------|--------|--------|-------|
| 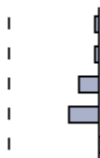 |  | 1 -0.043 | -0.043 | 0.0175 | 0.895 |
|                                                                                   |                                                                                   | 2 -0.039 | -0.041 | 0.0357 | 0.982 |
|                                                                                   |                                                                                   | 3 -0.178 | -0.183 | 0.5450 | 0.909 |
|                                                                                   |                                                                                   | 4 -0.272 | -0.302 | 2.3193 | 0.677 |
|                                                                                   |                                                                                   | 5 0.032  | -0.033 | 2.3684 | 0.796 |

The AC and PAC of construction land carrying capacity in Zhejiang

| Autocorrelation                                                                   | Partial Correlation                                                               | AC       | PAC    | Q-Stat | Prob  |
|-----------------------------------------------------------------------------------|-----------------------------------------------------------------------------------|----------|--------|--------|-------|
| 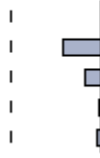 |  | 1 0.040  | 0.040  | 0.0152 | 0.902 |
|                                                                                   |                                                                                   | 2 -0.341 | -0.343 | 1.4088 | 0.494 |
|                                                                                   |                                                                                   | 3 -0.149 | -0.133 | 1.7650 | 0.623 |
|                                                                                   |                                                                                   | 4 -0.015 | -0.142 | 1.7705 | 0.778 |
|                                                                                   |                                                                                   | 5 -0.035 | -0.155 | 1.8285 | 0.872 |

The AC and PAC of ARIAM(2,1,2)

The ecological land carrying capacity in Zhejiang:

Second-order difference unit root test results of ecological land carrying capacity in Zhejiang

|                                        |           | t-Statistic | Prob.* |
|----------------------------------------|-----------|-------------|--------|
| Augmented Dickey-Fuller test statistic |           | -24.1115    | 0.0001 |
| Test critical values:                  | 1% level  | -3.5639     |        |
|                                        | 5% level  | -2.1574     |        |
|                                        | 10% level | -1.6104     |        |

| Autocorrelation                                                                     | Partial Correlation                                                                 | AC       | PAC    | Q-Stat | Prob  |
|-------------------------------------------------------------------------------------|-------------------------------------------------------------------------------------|----------|--------|--------|-------|
|  |  | 1 -0.022 | -0.022 | 0.0041 | 0.949 |
|                                                                                     |                                                                                     | 2 -0.152 | -0.152 | 0.2730 | 0.872 |
|                                                                                     |                                                                                     | 3 -0.066 | -0.075 | 0.3492 | 0.951 |
|                                                                                     |                                                                                     | 4 -0.261 | -0.297 | 2.7267 | 0.605 |

The AC and PAC of ecological land carrying capacity in Zhejiang

| Autocorrelation                                                                     | Partial Correlation                                                                 | AC       | PAC    | Q-Stat | Prob  |
|-------------------------------------------------------------------------------------|-------------------------------------------------------------------------------------|----------|--------|--------|-------|
| 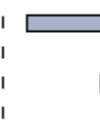 |  | 1 -0.695 | -0.695 | 4.2287 | 0.040 |
|                                                                                     |                                                                                     | 2 0.215  | -0.519 | 4.7683 | 0.092 |
|                                                                                     |                                                                                     | 3 -0.019 | -0.405 | 4.7747 | 0.189 |
|                                                                                     |                                                                                     | 4 -0.001 | -0.327 | 4.7748 | 0.311 |

The AC and PAC of ARIAM(1,2,1)

The cultivated land carrying capacity in Chongqing:

Second-order difference unit root test results of cultivated land carrying capacity in Chongqing

|                                        |           | t-Statistic | Prob.* |
|----------------------------------------|-----------|-------------|--------|
| Augmented Dickey-Fuller test statistic |           | -0.8291     | 0.0964 |
| Test critical values:                  | 1% level  | -3.2714     |        |
|                                        | 5% level  | -2.0823     |        |
|                                        | 10% level | -1.5998     |        |

| Autocorrelation                                                                   | Partial Correlation                                                               | AC       | PAC    | Q-Stat | Prob  |
|-----------------------------------------------------------------------------------|-----------------------------------------------------------------------------------|----------|--------|--------|-------|
| 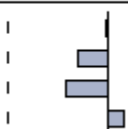 |  | 1 -0.019 | -0.019 | 0.0030 | 0.956 |
|                                                                                   |                                                                                   | 2 -0.263 | -0.263 | 0.8074 | 0.668 |
|                                                                                   |                                                                                   | 3 -0.369 | -0.408 | 3.1892 | 0.363 |
|                                                                                   |                                                                                   | 4 0.150  | 0.029  | 3.9781 | 0.409 |

The AC and PAC of cultivated land carrying capacity in Chongqing

| Autocorrelation                                                                   | Partial Correlation                                                               | AC       | PAC    | Q-Stat | Prob  |
|-----------------------------------------------------------------------------------|-----------------------------------------------------------------------------------|----------|--------|--------|-------|
| 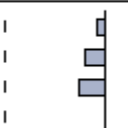 |  | 1 -0.076 | -0.076 | 0.0511 | 0.821 |
|                                                                                   |                                                                                   | 2 -0.184 | -0.191 | 0.4464 | 0.800 |
|                                                                                   |                                                                                   | 3 -0.234 | -0.277 | 1.4034 | 0.705 |
|                                                                                   |                                                                                   | 4 -0.006 | -0.113 | 1.4045 | 0.843 |

The AC and PAC of ARIAM(1,2,1)

The construction land carrying capacity in Chongqing:

First-order difference unit root test results of construction land carrying capacity in Chongqing

|                                        | t-Statistic | Prob.*  |
|----------------------------------------|-------------|---------|
| Augmented Dickey-Fuller test statistic | -9.7282     | 0.0001  |
| Test critical values:                  | 1% level    | -3.1095 |
|                                        | 5% level    | -2.0439 |
|                                        | 10% level   | -1.5973 |

| Autocorrelation                                                                     | Partial Correlation                                                                 | AC       | PAC    | Q-Stat | Prob  |
|-------------------------------------------------------------------------------------|-------------------------------------------------------------------------------------|----------|--------|--------|-------|
| 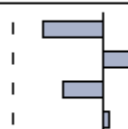 |  | 1 -0.545 | -0.545 | 2.8480 | 0.091 |
|                                                                                     |                                                                                     | 2 0.330  | 0.047  | 4.1509 | 0.125 |
|                                                                                     |                                                                                     | 3 -0.360 | -0.233 | 6.2249 | 0.101 |
|                                                                                     |                                                                                     | 4 0.052  | -0.351 | 6.2907 | 0.178 |
|                                                                                     |                                                                                     | 5 0.023  | -0.065 | 6.3158 | 0.277 |

The AC and PAC of construction land carrying capacity in Chongqing

| Autocorrelation                                                                     | Partial Correlation                                                                 | AC       | PAC    | Q-Stat | Prob  |
|-------------------------------------------------------------------------------------|-------------------------------------------------------------------------------------|----------|--------|--------|-------|
| 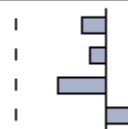 |  | 1 -0.208 | -0.208 | 0.4147 | 0.520 |
|                                                                                     |                                                                                     | 2 -0.150 | -0.201 | 0.6831 | 0.711 |
|                                                                                     |                                                                                     | 3 -0.435 | -0.560 | 3.7110 | 0.294 |
|                                                                                     |                                                                                     | 4 0.293  | -0.051 | 5.7698 | 0.217 |
|                                                                                     |                                                                                     | 5 -0.000 | -0.222 | 5.7698 | 0.329 |

The AC and PAC of ARIAM(3,1,1)

The ecological land carrying capacity in Chongqing:

Second-order difference unit root test results of ecological land carrying capacity in Chongqing

|                                        | t-Statistic | Prob.*  |
|----------------------------------------|-------------|---------|
| Augmented Dickey-Fuller test statistic | -1.7816     | 0.0759  |
| Test critical values:                  | 1% level    | -3.2714 |
|                                        | 5% level    | -2.0823 |
|                                        | 10% level   | -1.5998 |

| Autocorrelation                                                                   | Partial Correlation                                                               | AC       | PAC    | Q-Stat | Prob  |
|-----------------------------------------------------------------------------------|-----------------------------------------------------------------------------------|----------|--------|--------|-------|
| 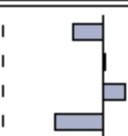 |  | 1 -0.272 | -0.272 | 0.6478 | 0.421 |
|                                                                                   |                                                                                   | 2 0.012  | -0.067 | 0.6494 | 0.723 |
|                                                                                   |                                                                                   | 3 0.192  | 0.192  | 1.2933 | 0.731 |
|                                                                                   |                                                                                   | 4 -0.431 | -0.367 | 7.8027 | 0.099 |

The AC and PAC of ecological land carrying capacity in Chongqing

| Autocorrelation                                                                   | Partial Correlation                                                               | AC       | PAC    | Q-Stat | Prob  |
|-----------------------------------------------------------------------------------|-----------------------------------------------------------------------------------|----------|--------|--------|-------|
| 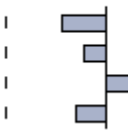 |  | 1 -0.387 | -0.387 | 1.3082 | 0.253 |
|                                                                                   |                                                                                   | 2 -0.202 | -0.413 | 1.7842 | 0.410 |
|                                                                                   |                                                                                   | 3 0.353  | 0.118  | 3.9701 | 0.265 |
|                                                                                   |                                                                                   | 4 -0.265 | -0.163 | 6.4235 | 0.170 |

The AC and PAC of ARIAM(2,2,1)

The cultivated land carrying capacity in Xinjiang:

First-order difference unit root test results of cultivated land carrying capacity in Xinjiang

|                                        | t-Statistic | Prob.*  |
|----------------------------------------|-------------|---------|
| Augmented Dickey-Fuller test statistic | -0.4543     | 0.0624  |
| Test critical values:                  | 1% level    | -3.1095 |
|                                        | 5% level    | -2.0439 |
|                                        | 10% level   | -1.5973 |

| Autocorrelation                                                                     | Partial Correlation                                                                 | AC       | PAC    | Q-Stat | Prob  |
|-------------------------------------------------------------------------------------|-------------------------------------------------------------------------------------|----------|--------|--------|-------|
| 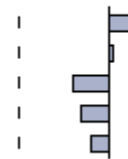 |  | 1 0.216  | 0.216  | 0.4495 | 0.503 |
|                                                                                     |                                                                                     | 2 0.032  | -0.016 | 0.4618 | 0.794 |
|                                                                                     |                                                                                     | 3 -0.323 | -0.342 | 2.1260 | 0.547 |
|                                                                                     |                                                                                     | 4 -0.262 | -0.144 | 3.7749 | 0.437 |
|                                                                                     |                                                                                     | 5 -0.164 | -0.070 | 5.0615 | 0.408 |

The AC and PAC of cultivated land carrying capacity in Xinjiang

| Autocorrelation                                                                     | Partial Correlation                                                                 | AC       | PAC    | Q-Stat | Prob  |
|-------------------------------------------------------------------------------------|-------------------------------------------------------------------------------------|----------|--------|--------|-------|
|  |  | 1 -0.048 | -0.048 | 0.0218 | 0.883 |
|                                                                                     |                                                                                     | 2 -0.011 | -0.014 | 0.0234 | 0.988 |
|                                                                                     |                                                                                     | 3 -0.205 | -0.207 | 0.6975 | 0.874 |
|                                                                                     |                                                                                     | 4 -0.225 | -0.257 | 1.9126 | 0.752 |
|                                                                                     |                                                                                     | 5 -0.011 | -0.062 | 1.9181 | 0.860 |

The AC and PAC of ARIAM(1,1,1)

The construction land carrying capacity in Xinjiang:

First-order difference unit root test results of construction land carrying capacity in Xinjiang

|                                        | t-Statistic | Prob.*  |
|----------------------------------------|-------------|---------|
| Augmented Dickey-Fuller test statistic | -1.1560     | 0.0981  |
| Test critical values:                  | 1% level    | -3.2174 |
|                                        | 5% level    | -2.8023 |
|                                        | 10% level   | -1.5909 |

| Autocorrelation                                                                   | Partial Correlation                                                               | AC | PAC    | Q-Stat | Prob   |       |
|-----------------------------------------------------------------------------------|-----------------------------------------------------------------------------------|----|--------|--------|--------|-------|
|  |  | 1  | 0.285  | 0.285  | 0.7811 | 0.377 |
|  |  | 2  | -0.257 | -0.368 | 1.5708 | 0.456 |
|  |  | 3  | -0.280 | -0.094 | 2.8217 | 0.420 |
|  |  | 4  | -0.243 | -0.257 | 4.2441 | 0.374 |
|  |  | 5  | -0.006 | 0.042  | 4.2456 | 0.515 |

The AC and PAC of construction land carrying capacity in Xinjiang

| Autocorrelation                                                                   |                                                                                   | Partial Correlation |        | AC     | PAC    | Q-Stat | Prob |
|-----------------------------------------------------------------------------------|-----------------------------------------------------------------------------------|---------------------|--------|--------|--------|--------|------|
|  |  | 1                   | -0.170 | -0.170 | 0.2778 | 0.598  |      |
|  |  | 2                   | -0.087 | -0.119 | 0.3688 | 0.832  |      |
|  |  | 3                   | -0.234 | -0.283 | 1.2414 | 0.743  |      |
|  |  | 4                   | -0.005 | -0.137 | 1.2421 | 0.871  |      |
|  |  | 5                   | -0.004 | -0.118 | 1.2428 | 0.941  |      |

The AC and PAC of ARIAM(2,1,2)

The ecological land carrying capacity in Xinjiang:

First-order difference unit root test results of ecological land carrying capacity in Xinjiang

|                                        | t-Statistic | Prob.*  |
|----------------------------------------|-------------|---------|
| Augmented Dickey-Fuller test statistic | -0.8547     | 0.0923  |
| Test critical values:                  | 1% level    | -3.1095 |
|                                        | 5% level    | -2.0439 |
|                                        | 10% level   | -1.5973 |

| Autocorrelation                                                                     | Partial Correlation                                                                 | AC | PAC    | Q-Stat | Prob   |       |
|-------------------------------------------------------------------------------------|-------------------------------------------------------------------------------------|----|--------|--------|--------|-------|
|  |  | 1  | 0.173  | 0.173  | 0.2863 | 0.593 |
|  |  | 2  | 0.055  | 0.026  | 0.3232 | 0.851 |
|  |  | 3  | -0.237 | -0.259 | 1.2207 | 0.748 |
|  |  | 4  | -0.203 | -0.133 | 2.2083 | 0.698 |
|  |  | 5  | -0.288 | -0.231 | 6.2014 | 0.287 |

The AC and PAC of ecological land carrying capacity in Xinjiang

| Autocorrelation                                                                     | Partial Correlation                                                                 | AC | PAC    | Q-Stat | Prob   |       |
|-------------------------------------------------------------------------------------|-------------------------------------------------------------------------------------|----|--------|--------|--------|-------|
|  |  | 1  | 0.015  | 0.015  | 0.0023 | 0.962 |
|  |  | 2  | -0.102 | -0.102 | 0.1267 | 0.939 |
|  |  | 3  | -0.190 | -0.188 | 0.7030 | 0.872 |
|  |  | 4  | -0.206 | -0.224 | 1.7185 | 0.787 |
|  |  | 5  | -0.018 | -0.073 | 1.7342 | 0.885 |

The AC and PAC of ARIAM(1,1,2)
